1 Chromatin remodeling in bovine embryos indicates species-specific regulation of genome activation

2 Michelle M Halstead<sup>1</sup>, Xin Ma<sup>1,2</sup>, Richard M Schultz<sup>3,4,†</sup>, and Pablo J Rossi<sup>1, † \*</sup>

3

4 <sup>1</sup> Department of Animal Science, University of California, Davis, CA, USA

5 <sup>2</sup> College of Animal Science and Technology, Jilin Agricultural University, Changchun, China

6 <sup>3</sup> Department of Anatomy, Physiology and Cell Biology, School of Veterinary Medicine, University of

7 California, Davis, CA, USA

8 <sup>4</sup> Department of Biology, University of Pennsylvania, Philadelphia, PA, USA

9 \* Correspondence: Department of Animal Science, University of California, 2239 Meyer Hall, Davis, CA

10 95616, USA. Tel: +530-771-7225; E-mail: [pross@ucdavis.edu](mailto:pross@ucdavis.edu)

11 † Grant support: NIH-NICHD R01HD070044

12 **Running Title:** Open chromatin in mammalian embryos

13 **Key words:** chromatin accessibility / cow / genome activation / maternal-to-zygotic transition /

14 preimplantation embryo

15

16

17 **Abstract**

18 The maternal-to-zygotic transition (MZT) is underpinned by wide-spread transcriptomic and epigenomic  
19 remodeling that facilitates totipotency acquisition. Factors regulating MZT vary across species and  
20 differences in timing of developmental transitions and motif enrichment at accessible chromatin between  
21 human and mouse embryos suggest a distinct regulatory circuitry. Profiling accessible chromatin in  
22 bovine preimplantation embryos—timing of developmental transitions in bovine closely resembles that in  
23 human—indicated that prior to embryonic genome activation (EGA) accessible chromatin is enriched in  
24 maternal transcription factor recognition sites, e.g., CTCF, KLFs, NFY, and SP1, echoing observations in  
25 humans and mice, and suggesting that a conserved set of maternal factors regulate chromatin remodeling  
26 prior to EGA. In contrast, open chromatin established during EGA was primarily enriched for homeobox  
27 motifs and showed remarkable similarities between cattle and humans, indicating that cattle could be a  
28 more relevant model for human preimplantation development than mice.

29

30 **Introduction**

31 Preimplantation development encompasses several critical milestones as embryos progress from  
32 fertilization to blastocyst formation. Fusion of the transcriptionally quiescent oocyte and sperm results in  
33 a zygote with two haploid pronuclei, which combine during the first round of replication when pronuclear  
34 membranes dissolve, allowing maternal and paternal chromosomes to intermingle on the metaphase plate.  
35 Subsequent rounds of cleavage ultimately form a blastocyst. However, the cleavage-stage embryo must  
36 first complete the maternal-to-zygotic transition (MZT), wherein the embryo assumes control over its own  
37 continued development by degrading oocyte-derived products and initiating its own transcriptional  
38 program. This dramatic change in gene expression proceeds gradually; minor embryonic genome  
39 activation (EGA) results in low levels of transcription in early cleavage-stage embryos<sup>1</sup>, and leads to  
40 major EGA, which involves wide-spread activation of embryonic transcription<sup>2</sup>. This shift from maternal  
41 dependence to self-sufficiency serves at least three functions: elimination of oocyte-specific messages,

42 replenishment of transcripts that are common to both the oocyte and the embryo, and generation of novel  
43 embryonic-specific transcripts.

44

45 The MZT also involves wide-spread changes in chromatin structure<sup>3</sup> and other epigenetic marks, which  
46 completely restructures the embryonic epigenome. This chromatin remodeling is necessary to eradicate  
47 gamete-specific signatures and establish an open chromatin landscape that supports embryonic  
48 transcriptional programs. Specifically, chromatin structure defines the genomic context within which  
49 transcriptional machinery can operate, thereby determining the cell-specific gene expression patterns that  
50 confer cell identity and function. Following fertilization, the zygotic genome is globally demethylated<sup>4</sup>,  
51 and this loss of DNA methylation coincides with global decreases in repressive histone modifications<sup>3,5</sup>.  
52 Generally, epigenetic factors linked to relaxed chromatin are more abundant in mouse zygotes, whereas  
53 factors implicated in chromatin compaction become more prevalent during EGA<sup>6</sup>, pointing to a highly  
54 permissive chromatin landscape in pre-EGA embryos. Indeed, mouse zygotes demonstrate elevated  
55 histone mobility<sup>7</sup>, highly dispersed chromatin<sup>8</sup>, and lack chromocenters (congregations of pericentromeric  
56 heterochromatin)<sup>9,10</sup>. Moreover, in mouse, 3-D chromatin architecture is largely absent after fertilization,  
57 and is then gradually established throughout preimplantation development<sup>11</sup>. This increasing chromatin  
58 compaction and organization facilitates long-distance chromatin interactions in later stage embryos<sup>11</sup>. The  
59 co-occurrence of genome activation and chromatin remodeling raises an interesting causality dilemma,  
60 namely, whether chromatin remodeling is necessary for transcription activation or whether transcription  
61 activation leads to chromatin accessibility. Several maternal products prompt transcription initiation by  
62 altering chromatin structure<sup>12-14</sup>, and some chromatin compaction occurs in the absence of embryonic  
63 transcription<sup>11</sup>. However, inhibiting embryonic transcription pervasively disrupts the establishment of  
64 open chromatin during EGA<sup>15,16</sup>, suggesting that EGA and chromatin remodeling are likely  
65 interdependent.

66

67 In mouse and human preimplantation embryos, accessible sites are gradually established as development  
68 progresses<sup>15–20</sup>; however, these open regions demonstrate different motif enrichment patterns, implicating  
69 distinct sets of transcription factors (TFs) in either murine (RARG, NR5A2, ESRRB),<sup>15</sup> or human EGA  
70 (OTX2, GSC, POU5F1)<sup>16,18</sup>. Although some TFs appear to regulate EGA in multiple species, i.e.  
71 KLFs<sup>15,16,21</sup>, DUX<sup>22–25</sup>, ZSCAN4<sup>26,27</sup>, and CTCF<sup>15,16,28</sup>, it remains unclear if there is any mechanistic  
72 conservation across mammals. In fact, the timing of genome activation is highly species-specific: major  
73 EGA in mice occurs during the 2-cell stage<sup>1</sup>, in humans<sup>29</sup> and pigs<sup>30</sup> during the 4- to-8-cell stage, and in  
74 sheep<sup>31</sup> and cattle<sup>32</sup> between the 8- and 16-cell stages. The relative timing with which mice activate their  
75 genomes could indicate that the mechanism behind murine EGA differs significantly from other species',  
76 which would have significant implications for modeling human preimplantation development. In  
77 particular, the timing of bovine EGA more closely resembles that of human EGA, as do global changes to  
78 histone PTMs: the active mark trimethylation of lysine 4 on histone 3 decreases in global abundance  
79 during human<sup>33</sup> and bovine EGA<sup>34</sup>, but increases during murine EGA<sup>35,36</sup>. However, the chromatin  
80 remodeling events that underscore bovine preimplantation development have yet to be catalogued, and it  
81 remains unclear whether the regulation and execution of the MZT in cattle resembles that which has been  
82 observed in humans.

83

84 To this end, we here describe the chromatin accessibility landscapes of bovine oocytes and  
85 preimplantation embryos using the Assay for Transposase Accessible Chromatin (ATAC-seq)<sup>37</sup>. We find  
86 that open chromatin is gained progressively throughout development, with promoters enriched for CTCF  
87 and NFY motifs gaining accessibility in earlier stages, and distal regions becoming accessible at later  
88 stages. Moreover, embryonic transcription was not required for the appearance of promoter open  
89 chromatin in 2- and 4-cell embryos, but was absolutely necessary to establish stage-specific and distal  
90 open chromatin, especially in 8-cell embryos, indicating that maternal and embryonic products both  
91 participate in chromatin remodeling in a complementary fashion. Sequence enrichment in open chromatin  
92 revealed that several TFs likely play roles in both bovine and human EGA (OTX2, SP1), whereas

93 regulators specific to murine EGA<sub>15</sub> demonstrate no enrichment in bovine (RARG, NR5A2, ESRRB),  
94 suggesting that cattle may be a more informative model for human preimplantation development.  
95 Nevertheless, several TFs (DUX, KLFs, CTCF, NFY) seem to play a role in preimplantation development  
96 in all three species, raising the possibility that events leading to EGA may be mechanistically conserved  
97 across mammals, whereas the specific transcriptional programs that are activated may differ between  
98 species.

99

## 100 **Results and Discussion**

### 101 **Global dynamics of open chromatin in bovine preimplantation embryos**

102 For each developmental stage, ATAC-seq libraries were prepared from cells derived from three separate  
103 oocyte collections. A subset of embryos from each collection was also cultured in the presence of a  
104 transcriptional inhibitor ( $\alpha$ -amanitin), to interrogate the causal relationship between embryonic  
105 transcription and chromatin remodeling (Figure 1a). Between 30 and 87 million non-mitochondrial  
106 monoclonal uniquely mapping reads were collectively obtained for each developmental stage, and at least  
107 20 million non-mitochondrial monoclonal reads were collectively obtained for transcription blocked  
108 embryos (TBEs) at each stage (Table S1). Genome-wide normalized ATAC-seq coverage demonstrated a  
109 striking shift in the open chromatin landscape between 4- and 8-cell embryos (Figure 1b), suggesting that  
110 large-scale chromatin remodeling coincided with the main transcriptomic shift observed during major  
111 EGA (Figure S1). Similarity between replicates (Table S2) indicated that both the technique and embryo  
112 production were robust, generating comparable chromatin accessibility profiles across different rounds of  
113 oocyte collection and embryo production (Figure 1c). Reads from replicates were pooled together to  
114 obtain greater sequencing depth and maximize power for identifying regions of open chromatin. To gauge  
115 changes in chromatin accessibility throughout development, regions of open chromatin, or peaks, were  
116 called for each stage of development. To minimize bias from sequencing depth, peaks were called from  
117 either 30 million monoclonal uniquely mapped reads when comparing different developmental stages, or  
118 20 million reads when comparing TBE with control embryos.

119 As observed in humans and mice<sup>15,16,18–20</sup>, regions of open chromatin were gradually established  
120 throughout bovine preimplantation development, with the lowest enrichment for accessible sites in 2-cell  
121 embryos (Figure 1d). Rather than reflecting chromatin inaccessibility in 2-cell embryos, this dearth of  
122 canonical “open chromatin” probably results from a highly permissive chromatin structure. Indeed,  
123 chromocenters are absent from bovine embryos until the early 8-cell stage<sup>9</sup>, indicating a relaxed  
124 chromatin configuration in early cleavage-stage embryos. Because assays that employ endonucleases,  
125 e.g., ATAC-seq and DNase-seq, depend on increased cutting events at consistently accessible loci, we  
126 speculate that genome-wide chromatin relaxation would lead to random cutting events genome-wide,  
127 resulting in the observed high background and low enrichment in 2-cell embryos. Attempts to use  
128 endonuclease-based methods to profile open chromatin in mouse zygotes<sup>15,20</sup> and human 2-cell  
129 embryos<sup>18,19</sup> have encountered similar difficulties with low enrichment. As in bovine embryos,  
130 chromocenters are also conspicuously absent in pre-EGA mouse embryos<sup>9,10</sup>, and electron microscopy<sup>8</sup>  
131 and fluorescence recovery after photobleaching analysis<sup>7</sup> also indicate highly dispersed chromatin.  
132 Furthermore, a recent study that detected open chromatin based on methylation of accessible GpC sites,  
133 rather than endonucleases, found that genome-wide accessibility in human embryos actually decreased  
134 from the zygote stage onward<sup>17</sup>. Thus, global chromatin relaxation appears to be a shared characteristic of  
135 human, bovine, and murine pre-EGA embryos.

136

137 It is tempting to speculate that this “naïve” chromatin state acts as a blank epigenetic slate, which is then  
138 gradually compacted and structured to meet the needs of the growing embryo. Indeed, accessible sites  
139 were progressively established in 4-cell, 8-cell, and morula stage embryos (Figure 1d). Interestingly,  
140 many of these regions were only open transiently at a specific stage, whereas others maintained their  
141 accessibility throughout later stages (Figure 1e), suggesting that chromatin remodeling serves two  
142 functions: progressive establishment of a “totipotent” chromatin landscape, and transient stage-specific  
143 regulation.

144

145 **Stepwise remodeling yields stage-specific open chromatin with distinct functionality**

146 To delve further into the potential function of regions that lost or gained accessibility between  
147 consecutive stages (Figure 2a), intergenic regions of open chromatin were evaluated for sequence  
148 enrichment. Although regulatory regions have not been annotated in cattle, intergenic open chromatin  
149 could correspond to enhancers, the activity of which is generally highly tissue-specific. Indeed, distal  
150 regions that became accessible at each developmental stage were enriched for different recognition motifs  
151 (Table S3). These enriched sequences corresponded to the known binding motifs of several TFs that were  
152 either maternally provided or expressed in embryos (Figure S2), demonstrating that the changing  
153 chromatin structure subjects each stage of development to distinct regulatory circuitry (Figure 2b).

154  
155 The first major transition in chromatin structure mostly involved loss of hyperaccessible sites in 2-cell  
156 embryos following fertilization (Figure 2a). Intergenic loci that lost accessibility during this transition  
157 (n=54,264) were enriched for the binding motifs of CTCF (an insulator protein implicated in 3D  
158 chromatin organization<sup>38</sup>), FIGLA (an oocyte-specific TF), and RFX factors (a highly conserved family of  
159 transcriptional repressors<sup>39</sup>; Figure 2b). Interestingly, one quarter of the intergenic regions that closed in  
160 2-cell embryos regained accessibility at the 4-cell stage (n=14,859), and many of these remained open all  
161 the way through to the morula stage (n=6,186). Most intergenic regions that closed after fertilization  
162 remained inaccessible in embryos, suggesting that they could contribute to oocyte-specific regulation. On  
163 the other hand, regions that re-opened in 4-cell embryos seem more likely to participate in house-keeping  
164 functions.

165  
166 The first major gains in accessibility occurred in 4-cell embryos (Figure 2a). About a quarter of the  
167 regions that opened during the 4-cell stage remained accessible in both 8-cell embryos and morulae  
168 (Figure 1e), although 74% of these had been previously open in GV oocytes (n=15,466). Surprisingly,  
169 nearly half of the regions that opened during the 4-cell stage were only transiently accessible (Figure 1e).  
170 This 4-cell-specific open chromatin was most significantly enriched for binding motifs of NFkB family

171 members (Figure 2c), which was particularly intriguing because NFkB activation is specifically necessary  
172 in 1-cell mouse embryos for development to progress past EGA<sup>40,41</sup>. Although NFkB factors are  
173 maternally provided (Figure 2c), they are initially sequestered in the cytoplasm until they translocate into  
174 the nucleus at the early 1-cell stage in mice<sup>40,41</sup> and the 4-to-8 cell stage in cattle<sup>42</sup>. In particular, one of  
175 the NFkB subunits capable of activating gene expression – RELA – binds DNA with increased frequency  
176 in bovine embryos compared to oocytes<sup>42</sup>, suggesting that NFkB activation of target gene expression  
177 could be one of the first events in a cascade leading to major EGA. In fact, one of the few genes with  
178 upregulated expression in 4-cell embryos, as compared to MII oocytes, was TRIM8 – a positive regulator  
179 of NFkB activity (Figure S3). Additionally, RELA binding sites that were accessible in 4- and 8-cell  
180 embryos mark genes that encode key regulators of early preimplantation development, raising the  
181 possibility that NFkB binding is involved in their transcription initiation (Figure S4), although the  
182 contribution of NFkB signaling to gene expression during minor EGA in cattle has not yet been  
183 established.

184  
185 In contrast to open chromatin in pre-EGA embryos, regions that gained accessibility at the 8-cell stage  
186 (Figure 2a) were considerably enriched for the binding motifs of several homeobox TFs, including OTX2,  
187 GSC, CRX, PHOX2A, PAX7, and PITX1 (Figure 2b,e), although only OTX1, OTX2, and PITX2 were  
188 appreciably expressed during the 8-cell stage (Figure 2f). Most notably, more than a third of the  
189 accessible intergenic loci in 8-cell embryos harbored a sequence that most closely matched DUX binding  
190 motifs (Figure 2g). The DUX homeoboxes have been extensively implicated in EGA regulation<sup>22–25</sup>, and  
191 DUXA is expressed transiently and strongly in bovine embryos during EGA (Figure 2h). The  
192 synchronized transcription of DUXA and increased accessibility of its binding sites during bovine  
193 development strongly indicates a conserved role for DUX in mammalian preimplantation development,  
194 especially considering that DUX family members are highly conserved and specific to placental  
195 mammals<sup>43,44</sup>. The factors that regulate DUXA expression in cattle remain unclear. Although maternally  
196 provided DPPA2 and DPPA4 induce Dux in mouse embryonic stem cells<sup>45</sup>, only DPPA3 is maternally



197 provided in cattle (Figure S5), and it is unknown if DPPA3 is capable of inducing DUXA expression;  
198 however, DPPA3 is maternally provided in mice, cattle, and humans<sup>S46,47</sup>, and knockdown of DPPA3  
199 decreases the developmental competency of mouse<sup>48</sup> and bovine embryos<sup>S47</sup>, strongly suggesting that it  
200 could activate DUXA expression. Further functional validation will be necessary to determine if DUXA  
201 is required for bovine embryogenesis, or if is an important but non-essential regulator of EGA, as in  
202 mouse<sup>49-51</sup>.

203

204 The expression profile of DUXA in bovine preimplantation development closely mirrored that of another  
205 TF implicated in EGA: ZSCAN4 (Figure S6a)<sup>52</sup>. ZSCAN4 is a downstream target of DUX factors in  
206 humans<sup>23</sup> and mice<sup>22,24</sup>, and the coordinated expression of these two factors in cattle certainly suggests a  
207 similar mechanism may be at play. Although ZSCAN4 depletion disrupts development past EGA in  
208 mice<sup>26</sup> and cattle<sup>27</sup>, its known binding motifs were not enriched in open chromatin during bovine  
209 preimplantation development (Figure S6b-d), suggesting that the binding motif of bovine ZSCAN4 likely  
210 differs from those in mice and humans.

211

212 Following major EGA, formation of the morula also incurred extensive chromatin remodeling, with even  
213 more sites gaining accessibility than during the 8-cell stage (Figure 2a). Compared to earlier stages,  
214 intergenic loci that gained accessibility in morulae were primarily enriched for GATA factor binding  
215 motifs (Figure 2a; Table S3) – key regulators of trophectoderm establishment and maintenance<sup>53</sup> –  
216 indicating that morulae are already initiating differentiation programs necessary for blastocyst formation.

217

### 218 **Progressive establishment of maintained open chromatin sets the stage for genome activation**

219 Although many regions only experienced stage-specific gains in accessibility, a stable open chromatin  
220 landscape was also progressively established after fertilization. As early as the 2-cell stage, regions began  
221 to gain accessibility that was maintained until at least the morula stage. These regions of maintained  
222 accessibility were heavily enriched for CTCF motifs (Figure 3a; Table S4b), especially those that were

223 first established during the 4-cell stage. CTCF binding delineates chromatin loop boundaries, thus  
224 determining the genomic space within which genes can interact with their regulatory elements<sup>38</sup>.  
225 Therefore, enrichment of CTCF motifs in maintained peaks could point to a gradual establishment of a  
226 stable 3-D chromatin architecture in preparation for major EGA. This proposal is consistent with 3-D  
227 chromatin architecture in mouse embryos, which is greatly diminished after fertilization and then  
228 gradually re-established throughout preimplantation development, facilitating long-distance chromatin  
229 contacts, i.e., promoter-enhancer interactions, in later stage embryos<sup>11</sup>. Indeed, transcription during minor  
230 EGA in mouse is primarily driven by proximal promoters, whereas enhancers are dispensable for  
231 transcription until major EGA<sup>54</sup>. The global reorganization of 3D chromatin architecture in mouse has  
232 also been observed in bovine embryos, wherein gene-rich regions switch from a random distribution to a  
233 chromosome-specific distribution during major EGA<sup>55</sup>. Collectively, these results suggest that gradual  
234 establishment of 3D chromatin architecture is a conserved feature of pre-EGA embryos, although the  
235 mechanisms regulating this restructuring remain unknown.

236  
237 Other than CTCF, maintained peaks were also more enriched for KLF motifs than transiently open sites  
238 (Figure 3b). Although most KLFs were not expressed until the 8-cell stage, several KLFs were maternally  
239 provided (Figure 3c), including KLF4, a master regulator of induced pluripotent stem cell (iPSC)  
240 reprogramming<sup>56</sup>. Recent evidence suggests that KLF4 contributes to reprogramming iPSC by mediating  
241 pluripotency-associated enhancer-promoter contacts<sup>57</sup>; thus, the concurrent establishment of open  
242 chromatin corresponding to CTCF and KLF binding motifs suggests that pre-EGA embryos are priming a  
243 similar mechanism for use during major EGA, especially considering that almost 50% of genes activated  
244 during bovine EGA contain KLF motifs in their promoters<sup>21</sup>.

245  
246 In fact, loci that remained open from the 2- and 4-cell stages onward occurred in genic regions more often  
247 than stage-specific open chromatin (Figure 3d) and marked the promoters of genes that were functionally  
248 enriched for housekeeping functions (Figure 3e), including 33 of the 51 genes that were upregulated in 4-

249 cell embryos compared to MII oocytes (Figure S3). Moreover, these regions of maintained accessibility  
250 were strongly enriched for NFY and SP1 binding sites (Table S4a,b), which is highly reminiscent of  
251 chromatin remodeling in mouse embryos, as proximal promoters enriched for NFY are the first regions to  
252 gain accessibility<sup>20</sup>. Of note, NFY enhances binding of the pluripotency factors POU5F1, SOX2, and KL4  
253 to their recognition motifs<sup>58,59</sup>, and is clearly involved in murine EGA, as NFY knockdown embryos  
254 demonstrated impaired open chromatin establishment and downregulation of gene expression<sup>20</sup>. Similarly,  
255 SP1 is essential for early mouse development, with knockout embryos arresting at day 11 of gestation<sup>60</sup>.  
256 Intriguingly, human zygotes also demonstrate KLF, SP1, and NFY motif enrichment in open chromatin<sup>19</sup>,  
257 overall suggesting that a conserved set of maternal regulators (CTCF, KLFs, SP1, NFY) participates in  
258 chromatin remodeling and transcription activation in pre-EGA embryos.

259

#### 260 **Both maternal products and embryonic transcription drive chromatin reorganization**

261 Considering that embryonic transcription is extremely limited before the 8-cell stage in cattle, the  
262 appearance of open chromatin in pre-EGA embryos suggests that maternal factors participate in  
263 chromatin remodeling. To further dissect the maternal contribution to epigenetic reprogramming and  
264 EGA, embryos were cultured in the presence of  $\alpha$ -amanitin to inhibit POLR2-dependent transcription  
265 elongation. Loss of embryonic transcription had a drastic inhibitory effect on the appearance of open  
266 chromatin that intensified as development progressed (Figure 4a); 64% of loci that should have opened  
267 during the 4-cell stage failed to become accessible without embryonic transcription, and in 8-cell TBE  
268 embryos, 96% of loci that should have opened remained closed (Figure 4b), disrupting the chromatin state  
269 of key genes, such as KLF4 (Figure 4c), and coinciding with developmental arrest.

270

271 Interestingly, inhibiting embryonic transcription did not uniformly affect chromatin remodeling genome-  
272 wide. Stage-specific open chromatin was preferentially disrupted in TBEs, whereas maintained open  
273 chromatin established in 2- and 4-cell embryos appeared even in the absence of embryonic transcription  
274 (Figure 4d). Transcription-independent maintained open chromatin marked the promoters of nearly 60%

275 of embryonically-expressed genes (n=1,038/1,784 genes identified from data from Bogliotti *et al* 2019;  
276 Figure S7), suggesting that maternal factors actively remodel the local chromatin structure of target genes,  
277 possibly priming them for expression later on in development. Nevertheless, the appearance of stage-  
278 specific open chromatin almost completely depended on embryonic transcription, indicating that maternal  
279 and embryonic factors cooperate in a complementary fashion to establish the appropriate chromatin  
280 landscape for activation of embryonic transcriptional programs.

281

### 282 **Open chromatin in preimplantation embryos is enriched for repetitive elements**

283 Evaluation of changes in chromatin structure as they relate to gene expression gives an incomplete  
284 perspective of the genome-wide changes that occur during preimplantation development, because the  
285 MZT is not just characterized by a shift in the transcriptome but also in the repeatome. Similar to other  
286 mammalian species, 44% of the bovine genome is comprised of repeats derived from retrotransposons<sup>61</sup>  
287 – interspersed repeats that are increasingly thought to play major roles in cellular processes and  
288 development. Retrotransposons propagate through a ‘copy and paste’ mechanism, and their expression is  
289 generally suppressed to avoid deleterious integrations<sup>62</sup>. However, retrotransposons are often actively  
290 transcribed in early embryos, and although this phenomenon was recently thought to be nothing more  
291 than opportunistic expression by repetitive elements due to an unusually permissive chromatin state in the  
292 developing embryo, the activity of some retrotransposons is actually crucial for development<sup>63</sup>. Although  
293 the specific mechanisms behind this necessity are still being investigated, transposable elements have  
294 been implicated at several regulatory levels, as they can provide binding sites for TFs, allowing them to  
295 be co-opted as alternative promoters and enhancers<sup>64</sup> and participate in 3-D chromatin architecture<sup>65</sup>.

296

297 Although repetitive element expression in bovine embryos was reported a decade ago using a cDNA  
298 array<sup>66</sup>, a complete catalogue of repeat transcription throughout bovine preimplantation development was  
299 lacking. To address this gap in knowledge, available RNA-seq data<sup>67</sup> were assessed for expression of  
300 repetitive elements. Importantly, these libraries were not subjected to polyA selection. As has been

301 observed in the mouse and human<sup>68,69</sup>, expression and accessibility of repetitive elements throughout  
302 bovine preimplantation development was highly stage-specific and dynamic (Figure 5a; Figure S8).  
303  
304 Non-long terminal repeat (non-LTR) retrotransposons – long interspersed elements (LINEs) and short  
305 interspersed elements (SINEs) – are increasingly transcribed during human preimplantation  
306 development<sup>17,68</sup>. In cattle, LINEs also demonstrated increasing expression (Figure 5a) and accessibility  
307 (Figure 5b) starting during the 8-cell stage. Although the function of LINE elements in bovine  
308 preimplantation embryos has yet to be established, their activation is crucial for mouse development:  
309 perturbing LINE expression in mouse preimplantation embryos causes developmental arrest at the 2-cell  
310 stage and perturbs gene expression<sup>70</sup>. Moreover, LINE-1 activation may regulate global chromatin  
311 accessibility in mouse embryos<sup>71</sup>. Of the SINE families, mammalian-wide interspersed repeats (MIR)  
312 expression and accessibility patterns most echoed those of L2 LINE elements, with increased expression  
313 and accessibility starting at the 8-cell stage, suggesting that these elements could be acting as enhancers  
314 or promoters.  
315  
316 In particular, LTR activation is a key feature in human<sup>68</sup>, mouse<sup>69</sup>, and bovine preimplantation  
317 development<sup>66</sup>. Of these, mammalian LTRs and endogenous retroviral elements (ERV) were  
318 increasingly enriched in open chromatin starting during the 8-cell stage (Figure 5b), although their  
319 transcript abundance dropped throughout development (Figure 5a), indicating that other mechanisms  
320 likely regulate repeat expression, e.g., DNA methylation or histone modifications<sup>72,73</sup>. Only endogenous  
321 retroviral K elements (ERV) demonstrated both increasing expression (Figure 5a) and moderately  
322 increased prevalence in distal open chromatin during the 8-cell stage (Figure 5b), suggesting that ERV  
323 elements function as regulatory elements, as observed in human preimplantation embryos<sup>74</sup>.  
324  
325 Mounting evidence suggests that specific types of LTR retrotransposons, especially intact elements, play  
326 pivotal roles in early development. During bovine preimplantation development, the most expressed

327 retrotransposons were ERV1-1\_BT and ERV1-2\_BT (Figure 6a), as has been observed previously<sup>66</sup>.

328 Upon further inspection, intact ERV1-1\_BT elements often co-occurred with MER41\_BT repeats in a  
329 specific sequence, which demonstrated a highly reproducible pattern of transcription at ERV1-1\_BT  
330 elements and chromatin accessibility at MER41\_BT elements (Figure S9a). Furthermore, MER41\_BT  
331 elements that were accessible in 8-cell embryos were enriched for the binding motifs of several  
332 pluripotency factors, including POU5F1, NFY, KLF4, OTX2, and TEAD (Figure S9b), suggesting that  
333 pluripotency factors are driving transposon expression.

334

335 DUX has also been implicated in driving the expression of intact ERVL elements in human and mouse  
336 pre-EGA embryos<sup>19,22–24</sup>. Specifically, in human embryos DUX4 appears to bind MLT2A1 elements –  
337 primate-specific LTRs that flank human ERVL –activating their expression<sup>19</sup>. Considering that intergenic  
338 open chromatin was especially enriched for DUX binding sites in 8-cell bovine embryos, it seemed likely  
339 that these sites would also correspond to retrotransposons. Indeed, several MLT elements were enriched  
340 in 8-cell open chromatin harboring DUX motifs (Table S5), suggesting that bovine DUX may bind and  
341 regulate LTRs with sequence similarity to primate-specific MLT2A1 elements. Nearly all LTRs that were  
342 enriched in 8-cell open chromatin with DUX binding sites demonstrated dynamic expression profiles  
343 throughout development (Figure S10). In particular, increasing accessibility at MLT1A0 elements  
344 harboring DUX recognition sites (Figure 6c) was mirrored by a sharp increase in transcription in 8-cell  
345 embryos (Figure 6d).

346

347 Whether the transcripts derived from LTRs are required for bovine development or are simply a result of  
348 opportunistic expression remains to be established. However, evidence in other species suggests that  
349 retrotransposon-derived regulatory elements are often co-opted by the embryo as promoters and  
350 enhancers<sup>64</sup>: a phenomenon which appears to extend to bovine embryos, as ATAC-seq and RNA-seq  
351 suggest that MLT1A0 elements are co-opted as alternative promoters at several loci, including CD1  
352 (Figure 6e), ZNF41, and LPIN2. As such, an interesting balance appears to exist between repetitive

353 elements and the embryo, wherein the repeatome leverages the embryo's existing regulatory network to  
354 drive transposition, while simultaneously providing new regulatory elements and TF binding sites that the  
355 embryo co-opts to drive the expression of its own transcriptional program.

356

### 357 **A model for mammalian genome activation**

358 Several lines of evidence suggest that the regulatory circuitry responsible for the MZT may differ  
359 between mammals. First, EGA occurs in a highly species-specific fashion, with the major wave of  
360 transcription in mice during the 2-cell stage<sup>1</sup>, in humans during the 4-to-8-cell stage<sup>29</sup>, and cattle during  
361 the 8-to-16-cell stage<sup>32</sup>. Second, the expression patterns of repetitive elements are not only highly-stage  
362 specific, but also species-specific; primate-specific and murine ERVL elements are strongly expressed  
363 during human and mouse preimplantation development, respectively<sup>19,22–24</sup>, whereas ERV1 elements were  
364 most prominently activated in bovine embryos. Finally, the maternal programs in human and mice are  
365 divergent; human maternal programs conspicuously lack the murine maternal effect transcripts POU5F1,  
366 HSF1, and DICER1, and are functionally enriched for translational processing<sup>46</sup>, reflecting the need to  
367 translate maternal messages during the extended period between fertilization and human EGA.

368

369 The relaxed chromatin structure in early preimplantation embryos provides a unique regulatory context  
370 for maternal factors, which are essential to support cleavage stage-embryos prior to genome activation,  
371 especially in species where EGA is delayed for several cell divisions, e.g., humans and cattle. Whereas  
372 the condensed chromatin structure in somatic cells generally restricts DNA-binding proteins to regions of  
373 open chromatin, the dispersed chromatin in 2-cell bovine embryos may allow maternal factors to  
374 opportunistically and pervasively bind their recognition motifs. Indeed, several maternal factors appear to  
375 participate in chromatin restructuring in pre-EGA embryos, leading to open chromatin establishment at  
376 promoters enriched for NFY and SP1 binding sites, as well as CTCF and KLF motifs. Although not  
377 maternally provided, the DUX family also appears to play a conserved role in genome activation. In  
378 humans and mice, DUX factors have been implicated in chromatin remodeling<sup>23,25</sup> and transcription

379 activation of cleavage-stage genes<sup>23</sup>. We find a similar pattern of DUX expression in bovine embryos, as  
380 well as increased accessibility of DUX binding sites around the 8-cell stage, suggesting that DUX may  
381 also modulate gene expression and chromatin accessibility during bovine EGA.

382

383 Although the chromatin landscape changes markedly upon major EGA in bovine, human<sup>16,17,19</sup>, and  
384 mouse<sup>15,20</sup> embryos, the regulatory circuitry that is active during this stage in development appears to  
385 differ significantly between humans and mice<sup>16</sup>, which suggests that regulation of mammalian EGA is  
386 highly species-specific. To identify and compare putative regulators of mammalian EGA, intergenic  
387 regions that were accessible during major EGA in bovine, human, and mouse embryos were evaluated for  
388 binding motif enrichment of actively expressed TFs. Comparing EGA regulatory circuitry between  
389 species reflects a stark divergence in regulatory and transcriptional programs that clearly separates  
390 humans and cattle from the mouse (Figure S11). Compared to mouse 2-cell embryos, open chromatin in  
391 bovine and human 8-cell embryos demonstrated remarkably similar patterns of sequence enrichment  
392 (Figure 7). In cattle and humans, SP1, OTX2, and NFY were particularly implicated during major EGA,  
393 whereas NR5A2, RARG, and ESRRB were solely enriched in mouse embryos.

394

395 Nevertheless, it is unclear if the regulatory factors that are enriched in open chromatin during major EGA  
396 are regulators of EGA or simply products of it. For instance, although NR5A2 is enriched in 2-cell mouse  
397 embryos, it is an early regulator of inner cell mass and trophoderm programs and is not essential for  
398 genome activation<sup>15</sup>. Similarly, OTX2 is essential for neuronal lineage specification in mice<sup>75</sup>, and has  
399 been implicated in the transition from naïve to primed pluripotency<sup>76</sup>. However, OTX2 protein is clearly  
400 present in human and marmoset zygotes<sup>46</sup>, suggesting that this homeobox TF may play an as-of-yet  
401 undetermined role in EGA. Although several TFs appeared to only be important in mouse, or in cattle and  
402 humans, KLFs were substantially enriched during EGA in all three species. Considering the well-  
403 established role of KLFs in somatic cell reprogramming and establishment of pluripotency in multiple  
404 species<sup>56,77</sup>, KLFs may play a conserved role in the MZT. Although future research will be necessary to



405 elucidate the function of specific regulatory factors, the high consistency between cattle and humans, both  
406 with respect to the timing of EGA and the regulatory circuitry that accompanies it, strongly suggests that  
407 cattle are a more appropriate model system for human preimplantation development than mouse.

408

## 409 **Conclusions**

410 Sweeping changes to chromatin structure during bovine preimplantation development suggest that 2-cell  
411 embryos are characterized by globally decondensed chromatin, which is gradually compacted as  
412 development progresses, echoing similar observations in humans and mice. In particular, it is tempting to  
413 speculate that a conserved set of maternal factors establish basal promoter accessibility and the necessary  
414 chromatin architecture for enhancer-promoter interactions that will drive gene expression during major  
415 EGA (Figure 8). However, the open chromatin landscape during major EGA clearly distinguished mice  
416 from cattle and humans, suggesting that whereas maternal regulation of EGA may be conserved across  
417 mammals, the transcriptional programs that are subsequently activated have diverged substantially.  
418 Practically, this difference suggests that human development may be better modeled in cattle than in  
419 mice. Nevertheless, the factors appear to regulate the MZT in cattle, humans, and mice certainly warrant  
420 further investigation and validation, which will provide invaluable insight into the regulatory framework  
421 that governs successful preimplantation development.

422

## 423 **Materials and Methods**

### 424 *Oocyte collection and maturation*

425 Ovaries were procured from a local abattoir and transported to the laboratory in a warm saline solution.  
426 Follicles measuring 2-10 mm were aspirated to obtain cumulus oocyte complexes (COCs). Only COCs  
427 with healthy layers of cumulus cells were selected for maturation. These were washed in collection  
428 medium (6:4 M199 (Sigma M7653)): SOF-Hepes, supplemented with 2% fetal bovine serum (FBS;  
429 Hyclone/Thermo Scientific) and transferred to maturation medium (modified M199 medium (Sigma

430 M2154)) supplemented with ALA-glutamine (0.1 mM), sodium pyruvate (0.2 mM), gentamicin (5  
431  $\mu\text{g/ml}$ ), EGF (50 ng/ml), oFSH (50 ng/ml), bLH (3  $\mu\text{g/ml}$ ), cysteamine (0.1 mM), and 10% FBS.

432

433 *In vitro fertilization and embryo culture*

434 After COCs matured for 24 h, MII oocytes were washed in SOF-IVF medium (107.7 mM NaCl, 7.16 mM  
435 KCl, 1.19 mM  $\text{KH}_2\text{PO}_4$ , 0.49 mM,  $\text{MgCl}_2$ , 1.17 mM  $\text{CaCl}_2$ , 5.3 mM sodium lactate, 25.07 mM  $\text{NaHCO}_3$ ,  
436 0.20 mM sodium pyruvate, 0.5 mM fructose, 1X non-essential amino acids, 5  $\mu\text{g/ml}$  gentamicin, 10  $\mu\text{g/ml}$   
437 heparin, 6 mg/ml fatty acid-free (FFA) BSA) and transferred to drops of SOF-IVF medium under mineral  
438 oil. Frozen semen from a Holstein bull was thawed, and 10<sup>6</sup> sperm/ml were added to drops with MII  
439 oocytes, which were incubated at 38.5°C for 12-18 h. Zygotes were then removed from fertilization  
440 medium, and cumulus cells were removed by vortexing for 5 min in SOF-Hepes medium. Zygotes were  
441 then transferred to culture medium (KSOMaa supplemented with 4mg/mL BSA) under mineral oil, and  
442 incubated at 38.5°C in 5%  $\text{CO}_2$ , 5%  $\text{O}_2$ , and 90%  $\text{N}_2$ . If embryos were to be transcriptionally inhibited, the  
443 culture medium was supplemented with  $\alpha$ -amanitin (50  $\mu\text{g/ml}$ ) on day one. On day three, the culture  
444 medium was supplemented with 5% stem-cell qualified FBS (Gemini Bio 100-525). Blastocyst  
445 development was evaluated at 7 days post-insemination (dpi).

446

447 *Collection of oocytes and preimplantation embryos for ATAC-seq*

448 Oocytes and embryos were collected for ATAC-seq library preparation from three separate collections  
449 per developmental stage. Embryos intended for collection at the 2-cell, 4-cell, or 8-cell stages were  
450 divided into two groups, one of which was supplemented with  $\alpha$ -amanitin, and cultured simultaneously.  
451 Germinal vesicle-stage oocytes were collected for ATAC-seq prior to maturation. Preimplantation  
452 embryos were collected at the 2-cell (30-32 h post-insemination), 4-cell (2 dpi), 8-cell (3 dpi), and morula  
453 stages (5 dpi).

454

455

456 *ATAC-seq library preparation*

457 Oocytes or embryos (a minimum of 500 cells) were treated with pronase (10 mg/ml) to completely  
458 remove the *zona pellucida* and washed with SOF-Hepes on a warming plate. Cells were then transferred  
459 to 1 ml cold SOF-Hepes, and centrifuged at 500 rcf, 4°C, for 5 min. Morulae were subjected to additional  
460 vortexing for 3 min in cold ATAC-seq lysis buffer (10 mM Tris-Cl, pH 7.4, 10 mM NaCl, 3 mM MgCl<sub>2</sub>  
461 and 0.1% IGEPAL CA-630). Cell pellets were then resuspended in 1 ml cold ATAC-seq cell lysis buffer  
462 and centrifuged at 500 rcf, 4°C, for 10 min. Nuclear pellets were then resuspended in 50 µl transposition  
463 reaction mix (25 µl TD buffer (Nextera DNA Library Prep Kit, Illumina), 2.5 µl TDE1 enzyme (Nextera  
464 DNA Library Prep Kit, Illumina), 22.5 µl nuclease-free H<sub>2</sub>O) and incubated for 60 min at 37°C, shaking  
465 at 300 rpm. The transposase, which is loaded with Illumina sequencing adapters, cuts DNA where it is not  
466 sterically hindered and simultaneously ligates adapters, effectively producing a library in one incubation  
467 step. Transposed DNA was purified with the MinElute PCR purification kit (Qiagen, Hilden, Germany)  
468 and eluted in 10 µl buffer EB. Libraries were then PCR amplified: 50 µl reactions (25 µl SsoFast  
469 Evagreen supermix with low ROX (Bio-Rad, Hercules, CA), 0.6 µl 25 µM custom Nextera PCR primer 1,  
470 0.6 µl 25 µM custom Nextera PCR primer 2 (for a list of primers, see Buenrostro *et al* (2015)<sup>78</sup>), 13 µl  
471 nuclease-free H<sub>2</sub>O, and 10 µl eluted DNA) were cycled as follows: 72°C for 5 min, 98°C for 30 s, and  
472 then thermocycling at 98°C for 10 s, 63°C for 30 s and 72°C for 1 min. Libraries from GV oocytes, 2-cell,  
473 and 4-cell embryos were thermocycled for 13 cycles, and 8-cell and morulae libraries were thermocycled  
474 for 11 cycles. PCR-amplified libraries were again purified with the MinElute PCR purification kit and  
475 eluted in 10 µl buffer EB. Libraries were then evaluated for DNA concentration and nucleosomal  
476 laddering patterns using the Bioanalyzer 2100 DNA High Sensitivity chip (Agilent, Palo Alto, CA).  
477 Expected nucleosomal laddering was evidenced by the presence of both small fragments, corresponding  
478 to hyper-accessible DNA that was frequently transposed, and larger fragments, corresponding to DNA  
479 that was wrapped around one or more nucleosomes. This study focused on mapping open chromatin;  
480 therefore, the sub-nucleosomal length fraction of each library (150-250 bp) was size selected using the  
481 PippinHT system (Sage Science, Beverly, MA) with 3% agarose cassettes. Size-selected libraries were

482 run on a Bioanalyzer DNA High Sensitivity chip to confirm size-selection and determine DNA  
483 concentration. Final libraries were then pooled for sequencing on the Illumina NextSeq platform to  
484 generate 40 bp paired end reads.

485

#### 486 *ATAC-seq read alignment and peak calling*

487 Raw sequencing reads were trimmed with Trim\_Galore, a wrapper around Cutadapt (v0.4.0)<sup>79</sup>, to remove  
488 residual Illumina adapter sequences and low quality (q<20) ends, keeping unpaired reads and reads 10 bp  
489 or longer after trimming. Trimmed reads were then aligned to either the GRCm38 (mouse), GRCh38  
490 (human), or ARS-UCD1.2 (cattle) assemblies using BWA aln (-q 15) and sampe<sup>80</sup>. PCR duplicates were  
491 removed with PicardTools (v2.8.1), and mitochondrial and low-quality alignments (q<15) were removed  
492 with SAMtools (v1.7)<sup>81</sup>. Alignments from biological replicates from each stage were merged and  
493 randomly subsampled to equivalent depth with SAMtools for detection of open chromatin. To determine  
494 which regions of the genome demonstrated significant enrichment of ATAC-seq signal, broad peaks were  
495 called with MACS2 (v2.1.1)<sup>82</sup>, using a q-value cutoff of 0.05, and settings *--nomodel --shift -100 --extsize*  
496 *200*.

497

#### 498 *RNA-seq alignment and gene expression quantification*

499 Raw sequencing reads were trimmed with Trimmomatic (v0.33)<sup>83</sup>. Low-quality leading and trailing bases  
500 (3 bases) were clipped, and Illumina adapter sequences were removed, allowing 2 seed mismatches, a  
501 palindrome clip threshold of 30, and a simple clip threshold of 10. Sliding window trimming was  
502 conducted with a window size of 4 bases, and a quality threshold of 15. Reads 36 bases or longer were  
503 retained after trimming. Trimmed reads were aligned to either the GRCm38 (mouse), GRCh38 (human),  
504 or ARS-UCD1.2 (cattle) assemblies with STAR (v2.7.2a)<sup>84</sup> with options *-outFilterScoreMinOverLread*  
505 *0.85* and *-seedSearchStartLmax 30*. Low quality alignments (q<5) were removed with SAMtools. Raw  
506 counts were calculated for genes in the Ensembl 96 annotations for each species with  
507 *summarizeOverlaps*, from the R package GenomicAlignments (v1.18.1)<sup>85</sup>, using 'Union' mode and

508 allowing fragments for paired end data. Gene counts were MLE-normalized using the DESeq2 R package  
509 (v1.22.2)<sup>86</sup> and submitted to the variance stabilizing transformation for some analyses. DESeq2 was also  
510 used for differential expression analysis, with genes demonstrating a  $\log_{2}FC > 2$  and an adjusted p-value  $<$   
511 0.05 considered differentially expressed.

512

### 513 *Repeat expression quantification*

514 Trimmed RNA-seq reads were aligned to the ARS-UCD1.2 genome assembly with STAR with options –  
515 *outFilterMultimapNmax 100*, *–winAnchorMultimapNmax 100*, and *–twopassMode Basic*. Raw expression  
516 values for individual repetitive elements were calculated for repeats in the RepeatMasker annotation for  
517 the ARS-UCD1.2 assembly (downloaded from the UCSC Genome Browser) using TEToolkit (v2.0.3)<sup>87</sup> in  
518 ‘multi’ mode, which improves quantification of transposable elements transcripts by including  
519 ambiguously mapped reads. Raw expression values were MLE-normalized using DESeq2.

520

### 521 *Comparison of replicate libraries and ATAC-seq and RNA-seq signal at regions of interest*

522 For both ATAC-seq and RNA-seq data, alignments were converted to bigwig format using bamCoverage  
523 from the DeepTools suite<sup>88</sup>, which binned the genome into 50 bp windows and calculated normalized  
524 signal (reads per kilobase million; RPKM) in each window. The plotPCA function from DeepTools was  
525 then used to generate principal components plots, with options *–transpose* and *–log2*. The plotCorrelation  
526 function from DeepTools was used to calculate the Spearman correlation coefficient between replicate  
527 libraries, based on genome-wide normalized coverage. To assess average accessibility or expression at  
528 genomic intervals of interest, average ATAC-seq or RNA-seq normalized signal from bigwig files was  
529 visualized using the Deeptools plotHeatmap function.

530

### 531 *Comparison and classification of ATAC-seq peaks*

532 Peak sets from different stages were compared using the BEDtools intersect function<sup>89</sup>, requiring a  
533 minimum of 1 bp overlap to consider a peak shared by both sets. Similarly, peaks were classified as genic

534 if they overlapped either the 2 kb region upstream of a transcription start site (TSS), exons, or introns by 1  
535 bp. Otherwise, peaks were considered intergenic.

536

#### 537 *Motif enrichment*

538 Genomic regions were evaluated for binding motif enrichment using the findMotifsGenome.pl script from  
539 HOMER (v4.8)<sup>90</sup>, using the exact sizes of the input genomic intervals (*-size given*). The most significant  
540 known or *de novo* motifs were reported, based on p-value. Known motifs that matched significantly  
541 enriched *de novo* motifs were reported if their match score exceeded 0.6.

542

#### 543 *Genome-wide motif location prediction*

544 Position-weight matrices were downloaded from the JASPAR database for TFs of interest<sup>91</sup>. Using the  
545 FIMO tool from the MEME suite (v5.0.4)<sup>92</sup>, TF motif locations ( $p < 1e-4$ ) were predicted genome-wide in  
546 the ARS-UCD1.2 genome assembly.

547

#### 548 *Repeat class enrichment in genomic intervals*

549 To determine if repetitive elements (either individual elements, families, or classes) were enriched in open  
550 chromatin, the number of ATAC-seq peaks overlapping a set of repetitive elements was compared to  
551 randomized intervals (ATAC-seq peak locations shuffled with BEDtools shuffle function) overlapping  
552 the same set of repetitive elements, yielding a log ratio of random to observed.

553

#### 554 *Functional annotation enrichment analysis*

555 Gene sets were submitted to DAVID (v6.8)<sup>93,94</sup> to identify enriched biological functions. Gene ontology  
556 terms with a false discovery rate (FDR)  $< 0.05$  were reported.

557

558

559

560 **Acknowledgements**

561 This work was supported by a grant from NIH-NICHD (R01HD070044) to P.J.R. and R.M.S. Semen  
562 used for *in vitro* embryo production was provided by Semex (Madison, WI). M.M.H. was supported by  
563 USDA NIFA National Need Fellowship #20143842021796 and an Austin Eugene Lyons Fellowship. The  
564 authors thank the entire Ross laboratory for contributions to embryo production and lively discussion.

565

566 **Author contributions**

567 M.M.H., R.M.S. and P.J.R conceived and designed the experiments; X.M. and M.M.H performed the  
568 experiments; M.M.H., R.M.S. and P.J.R wrote the manuscript.

569

570 **Competing interests**

571 The authors declare no competing financial interests.

572

573 **Data availability**

574 The following published data sets were used, and accessed through the NCBI GEO repository: for bovine  
575 oocytes and *in vitro* produced embryos, raw RNA-seq data were downloaded from accession number  
576 GSE52415<sup>67</sup>, and mouse and human preimplantation embryo ATAC-seq and RNA-seq data, raw  
577 sequencing files were downloaded from accession numbers GSE66390<sup>15</sup> and GSE101571<sup>16</sup>, respectively.

578 The ATAC-seq data produced in this study is available via the NCBI SRA repository under the SRA  
579 accession number PRJNA595394.

580

581 **References**

- 582 1. Ram, P. T. & Schultz, R. M. Reporter gene expression in G2 of the 1-cell mouse embryo. *Dev.*  
583 *Biol.* **156**, 552–556 (1993).
- 584 2. Schulz, K. N. & Harrison, M. M. Mechanisms regulating zygotic genome activation. *Nat. Rev.*  
585 *Genet.* **20**, 221–234 (2019).

- 586 3. Eckersley-Maslin, M. A., Alda-Catalinas, C. & Reik, W. Dynamics of the epigenetic landscape  
587 during the maternal-to-zygotic transition. *Nat. Rev. Mol. Cell Biol.* **19**, 436–450 (2018).
- 588 4. White, C. R., MacDonald, W. A. & Mann, M. R. W. Conservation of DNA Methylation  
589 Programming Between Mouse and Human Gametes and Preimplantation Embryos. *Biol. Reprod.*  
590 **95**, 61 (2016).
- 591 5. Ross, P. J. *et al.* Polycomb gene expression and histone H3 lysine 27 trimethylation changes  
592 during bovine preimplantation development. *Reproduction* **136**, 777–785 (2008).
- 593 6. Funaya, S. & Aoki, F. Regulation of zygotic gene activation by chromatin structure and epigenetic  
594 factors. *J. Reprod. Dev.* **63**, 359–363 (2017).
- 595 7. Ooga, M., Fulka, H., Hashimoto, S., Suzuki, M. G. & Aoki, F. Analysis of chromatin structure in  
596 mouse preimplantation embryos by fluorescent recovery after photobleaching. *Epigenetics* **11**, 85–  
597 94 (2016).
- 598 8. Ahmed, K. *et al.* Global chromatin architecture reflects pluripotency and lineage commitment in  
599 the early mouse embryo. *PLoS One* **5**, e10531–e10531 (2010).
- 600 9. Martin, C. *et al.* Genome restructuring in mouse embryos during reprogramming and early  
601 development. *Dev. Biol.* **292**, 317–332 (2006).
- 602 10. Probst, A. V *et al.* A strand-specific burst in transcription of pericentric satellites is required for  
603 chromocenter formation and early mouse development. *Dev Cell* **19**, 625–638 (2010).
- 604 11. Du, Z. *et al.* Allelic reprogramming of 3D chromatin architecture during early mammalian  
605 development. *Nature* **547**, 232–235 (2017).
- 606 12. Bultman, S. J. *et al.* Maternal BRG1 regulates zygotic genome activation in the mouse. *Genes Dev*  
607 **20**, 1744–1754 (2006).
- 608 13. Jimenez, R. *et al.* Maternal SIN3A regulates reprogramming of gene expression during mouse  
609 preimplantation development. *Biol. Reprod.* **93**, 89 (2015).
- 610 14. Hernandez, C. *et al.* Dppa2/4 Facilitate Epigenetic Remodeling during Reprogramming to  
611 Pluripotency. *Cell Stem Cell* **23**, 396–411.e8 (2018).



- 612 15. Wu, J. *et al.* The landscape of accessible chromatin in mammalian preimplantation embryos.  
613 *Nature* **534**, 652–657 (2016).
- 614 16. Wu, J. *et al.* Chromatin analysis in human early development reveals epigenetic transition during  
615 ZGA. (2018). doi:10.1038/s41586-018-0080-8
- 616 17. Li, L. *et al.* Single-cell multi-omics sequencing of human early embryos. *Nat. Cell Biol.* **20**, 847–  
617 858 (2018).
- 618 18. Gao, L. *et al.* Chromatin Accessibility Landscape in Human Early Embryos and Its Association  
619 with Evolution. *Cell* **173**, 248-259.e15 (2018).
- 620 19. Liu, L. *et al.* An integrated chromatin accessibility and transcriptome landscape of human pre-  
621 implantation embryos. *Nat. Commun.* **10**, 364 (2019).
- 622 20. Lu, F. *et al.* Establishing Chromatin Regulatory Landscape during Mouse Preimplantation  
623 Development. *Cell* **165**, 1375–1388 (2016).
- 624 21. Bogliotti, Y. S. *et al.* Transcript profiling of bovine embryos implicates specific transcription  
625 factors in the maternal-to-embryo transition. *Biol. Reprod.* (2019). doi:10.1093/biolre/ioz209
- 626 22. Whiddon, J. L., Langford, A. T., Wong, C.-J., Zhong, J. W. & Tapscott, S. J. Conservation and  
627 innovation in the DUX4-family gene network. *Nat. Genet.* **49**, 935–940 (2017).
- 628 23. Hendrickson, P. G. *et al.* Conserved roles of mouse DUX and human DUX4 in activating  
629 cleavage-stage genes and MERVL/HERVL retrotransposons. *Nat. Genet.* **49**, 925–934 (2017).
- 630 24. De Iaco, A. *et al.* DUX-family transcription factors regulate zygotic genome activation in  
631 placental mammals. *Nat. Genet.* **49**, 941–945 (2017).
- 632 25. Kruse, K. *et al.* Transposable elements drive reorganisation of 3D chromatin during early  
633 embryogenesis. *bioRxiv* 523712 (2019). doi:10.1101/523712
- 634 26. Falco, G. *et al.* Zscan4: a novel gene expressed exclusively in late 2-cell embryos and embryonic  
635 stem cells. *Dev. Biol.* **307**, 539–550 (2007).
- 636 27. Takahashi, K., Ross, P. J. & Sawai, K. The necessity of ZSCAN4 for preimplantation  
637 development and gene expression of bovine embryos. *J. Reprod. Dev.* **65**, 319–326 (2019).

- 638 28. Chen, X. *et al.* Key role for CTCF in establishing chromatin structure in human embryos. *Nature*  
639 **576**, 306–310 (2019).
- 640 29. Braude, P., Bolton, V. & Moore, S. Human gene expression first occurs between the four- and  
641 eight-cell stages of preimplantation development. *Nature* **332**, 459–461 (1988).
- 642 30. Davis, D. L. Culture and storage of pig embryos. *J. Reprod. Fertil. Suppl.* **33**, 115–124 (1985).
- 643 31. Crosby, I. M., Gandolfi, F. & Moor, R. M. Control of protein synthesis during early cleavage of  
644 sheep embryos. *J. Reprod. Fertil.* **82**, 769–775 (1988).
- 645 32. Barnes, F. L. & First, N. L. Embryonic transcription in in vitro cultured bovine embryos. *Mol.*  
646 *Reprod. Dev.* **29**, 117–123 (1991).
- 647 33. Zhang, A. *et al.* Dynamic changes of histone H3 trimethylated at positions K4 and K27 in human  
648 oocytes and preimplantation embryos. *Fertil. Steril.* **98**, 1009–1016 (2012).
- 649 34. Wu, X. *et al.* Multiple histone site epigenetic modifications in nuclear transfer and in vitro  
650 fertilized bovine embryos. *Zygote* **19**, 31–45 (2011).
- 651 35. Liu, X. *et al.* Distinct features of H3K4me3 and H3K27me3 chromatin domains in pre-  
652 implantation embryos. *Nature* **537**, 558–562 (2016).
- 653 36. Zhang, B. *et al.* Allelic reprogramming of the histone modification H3K4me3 in early mammalian  
654 development. *Nature* **537**, 553–557 (2016).
- 655 37. Buenrostro, J. D., Giresi, P. G., Zaba, L. C., Chang, H. Y. & Greenleaf, W. J. Transposition of  
656 native chromatin for fast and sensitive epigenomic profiling of open chromatin, DNA-binding  
657 proteins and nucleosome position. *Nat Methods* **10**, 1213–1218 (2013).
- 658 38. Ghirlando, R. & Felsenfeld, G. CTCF: making the right connections. *Genes Dev* **30**, 881–891  
659 (2016).
- 660 39. Lubelsky, Y., Reuven, N. & Shaul, Y. Autorepression of Rfx1 Gene Expression: Functional  
661 Conservation from Yeast to Humans in Response to DNA Replication Arrest. *Mol. Cell. Biol.* **25**,  
662 10665–10673 (2005).
- 663 40. Nishikimi, A., Mukai, J. & Yamada, M. Nuclear translocation of nuclear factor kappa B in early 1-

- 664 cell mouse embryos. *Biol. Reprod.* **60**, 1536–1541 (1999).
- 665 41. Yang, Y. *et al.* The E3 ubiquitin ligase RNF114 and TAB1 degradation are required for maternal-  
666 to-zygotic transition. *EMBO Rep.* **18**, 205–216 (2017).
- 667 42. Paciolla, M. *et al.* Nuclear factor-kappa-B-inhibitor alpha (NFKBIA) is a developmental marker of  
668 NF-kappaB/p65 activation during in vitro oocyte maturation and early embryogenesis. *Hum.*  
669 *Reprod.* **26**, 1191–1201 (2011).
- 670 43. Young, J. M. *et al.* DUX4 binding to retroelements creates promoters that are active in FSHD  
671 muscle and testis. *PLoS Genet.* **9**, e1003947–e1003947 (2013).
- 672 44. Leidenroth, A. & Hewitt, J. E. A family history of DUX4: phylogenetic analysis of DUXA, B, C  
673 and Duxbl reveals the ancestral DUX gene. *BMC Evol. Biol.* **10**, 364 (2010).
- 674 45. Eckersley-Maslin, M. *et al.* Dppa2 and Dppa4 directly regulate the Dux-driven zygotic  
675 transcriptional program. *Genes Dev.* **33**, 194–208 (2019).
- 676 46. Boroviak, T. *et al.* Single cell transcriptome analysis of human, marmoset and mouse embryos  
677 reveals common and divergent features of preimplantation development. *Development* **145**,  
678 dev167833 (2018).
- 679 47. Bakhtari, A. & Ross, P. J. DPPA3 prevents cytosine hydroxymethylation of the maternal  
680 pronucleus and is required for normal development in bovine embryos. *Epigenetics* **9**, 1271–1279  
681 (2014).
- 682 48. Payer, B. *et al.* Stella is a maternal effect gene required for normal early development in mice.  
683 *Curr. Biol.* **13**, 2110–2117 (2003).
- 684 49. Chen, Z. & Zhang, Y. Loss of DUX causes minor defects in zygotic genome activation and is  
685 compatible with mouse development. *Nat. Genet.* **51**, 1 (2019).
- 686 50. Guo, M. *et al.* Precise temporal regulation of Dux is important for embryo development. *Cell Res.*  
687 (2019). doi:10.1038/s41422-019-0238-4
- 688 51. Iaco, A. De, Verp, S., Offner, S. & Trono, D. DUX is a non-essential synchronizer of zygotic  
689 genome activation. *bioRxiv* 569434 (2019). doi:10.1101/569434

- 690 52. Ko, M. S. H. Zygotic Genome Activation Revisited: Looking Through the Expression and  
691 Function of Zscan4. *Curr. Top. Dev. Biol.* **120**, 103–124 (2016).
- 692 53. Bai, H., Sakurai, T., Godkin, J. D. & Imakawa, K. Expression and potential role of GATA factors  
693 in trophoblast development. *J. Reprod. Dev.* **59**, 1–6 (2013).
- 694 54. Wiekowski, M., Miranda, M. & DePamphilis, M. L. Requirements for promoter activity in mouse  
695 oocytes and embryos distinguish paternal pronuclei from maternal and zygotic nuclei. *Dev. Biol.*  
696 **159**, 366–378 (1993).
- 697 55. Koehler, D. *et al.* Changes of higher order chromatin arrangements during major genome  
698 activation in bovine preimplantation embryos. *Exp. Cell Res.* **315**, 2053–2063 (2009).
- 699 56. Takahashi, K. & Yamanaka, S. Induction of pluripotent stem cells from mouse embryonic and  
700 adult fibroblast cultures by defined factors. *Cell* **126**, 663–676 (2006).
- 701 57. Di Giammartino, D. C. *et al.* KLF4 is involved in the organization and regulation of pluripotency-  
702 associated three-dimensional enhancer networks. *Nat. Cell Biol.* **21**, 1179–1190 (2019).
- 703 58. Oldfield, A. J. *et al.* Histone-fold domain protein NF-Y promotes chromatin accessibility for cell  
704 type-specific master transcription factors. *Mol. Cell* **55**, 708–722 (2014).
- 705 59. Soufi, A. *et al.* Pioneer transcription factors target partial DNA motifs on nucleosomes to initiate  
706 reprogramming. *Cell* **161**, 555–568 (2015).
- 707 60. Marin, M., Karis, A., Visser, P., Grosveld, F. & Philipsen, S. Transcription Factor Sp1 Is Essential  
708 for Early Embryonic Development but Dispensable for Cell Growth and Differentiation. *Cell* **89**,  
709 619–628 (1997).
- 710 61. Adelson, D. L., Raison, J. M. & Edgar, R. C. *Characterization and distribution of*  
711 *retrotransposons and simple sequence repeats in the bovine genome. PNAS August* **4**, (2009).
- 712 62. Hancks, D. C. & Kazazian Jr, H. H. Roles for retrotransposon insertions in human disease. *Mob.*  
713 *DNA* **7**, 9 (2016).
- 714 63. Spadafora, C. Endogenous reverse transcriptase: a mediator of cell proliferation and  
715 differentiation. *Cytogenet. Genome Res.* **105**, 346–350 (2004).

- 716 64. Chuong, E. B., Elde, N. C. & Feschotte, C. Regulatory activities of transposable elements: from  
717 conflicts to benefits. *Nat. Rev. Genet.* **18**, 71–86 (2017).
- 718 65. Raviram, R. *et al.* Analysis of 3D genomic interactions identifies candidate host genes that  
719 transposable elements potentially regulate. *Genome Biol.* **19**, 216 (2018).
- 720 66. Bui, L. C. *et al.* Retrotransposon expression as a defining event of genome reprogramming in  
721 fertilized and cloned bovine embryos. *Reproduction* **138**, 289–299 (2009).
- 722 67. Graf, A. *et al.* Genome activation in bovine embryos: review of the literature and new insights  
723 from RNA sequencing experiments. *Anim Reprod Sci* **149**, 46–58 (2014).
- 724 68. Yandım, C. & Karakulah, G. Expression dynamics of repetitive DNA in early human embryonic  
725 development. *BMC Genomics* **20**, 439 (2019).
- 726 69. Franke, V. *et al.* Long terminal repeats power evolution of genes and gene expression programs in  
727 mammalian oocytes and zygotes. *Genome Res.* **27**, 1384–1394 (2017).
- 728 70. Beraldi, R., Pittoggi, C., Sciamanna, I., Mattei, E. & Spadafora, C. Expression of LINE-1  
729 retroposons is essential for murine preimplantation development. *Mol Reprod Dev* **73**, 279–287  
730 (2006).
- 731 71. Jachowicz, J. W. *et al.* LINE-1 activation after fertilization regulates global chromatin  
732 accessibility in the early mouse embryo. *Nat. Genet.* **49**, 1502 (2017).
- 733 72. Bestor, T. H. & Bourc'his, D. Transposon silencing and imprint establishment in mammalian germ  
734 cells. *Cold Spring Harb. Symp. Quant. Biol.* **69**, 381–387 (2004).
- 735 73. Martens, J. H. *et al.* The profile of repeat-associated histone lysine methylation states in the mouse  
736 epigenome. *Embo j* **24**, 800–812 (2005).
- 737 74. Pontis, J. *et al.* Hominoid-Specific Transposable Elements and KZFPs Facilitate Human  
738 Embryonic Genome Activation and Control Transcription in Naive Human ESCs. *Cell Stem Cell*  
739 **24**, 724-735.e5 (2019).
- 740 75. Perea-Gomez, A. *et al.* Otx2 is required for visceral endoderm movement and for the restriction of  
741 posterior signals in the epiblast of the mouse embryo. *Development* **128**, 753–765 (2001).

- 742 76. Acampora, D., Di Giovannantonio, L. G. & Simeone, A. Otx2 is an intrinsic determinant of the  
743 embryonic stem cell state and is required for transition to a stable epiblast stem cell condition.  
744 *Development* **140**, 43–55 (2013).
- 745 77. Graf, T. Historical origins of transdifferentiation and reprogramming. *Cell Stem Cell* **9**, 504–516  
746 (2011).
- 747 78. Buenrostro, J. D., Wu, B., Chang, H. Y. & Greenleaf, W. J. ATAC-seq: A Method for Assaying  
748 Chromatin Accessibility Genome-Wide. *Curr Protoc Mol Biol* **109**, 21 29 1–9 (2015).
- 749 79. Martin, M. Cutadapt removes adapter sequences from high-throughput sequencing reads. *2011* **17**,  
750 (2011).
- 751 80. Li, H. & Durbin, R. Fast and accurate long-read alignment with Burrows-Wheeler transform.  
752 *Bioinformatics* **26**, 589–595 (2010).
- 753 81. Li, H. *et al.* The Sequence Alignment/Map format and SAMtools. *Bioinformatics* **25**, 2078–2079  
754 (2009).
- 755 82. Zhang, Y. *et al.* Model-based analysis of ChIP-Seq (MACS). *Genome Biol* **9**, R137 (2008).
- 756 83. Bolger, A. M., Lohse, M. & Usadel, B. Trimmomatic: a flexible trimmer for Illumina sequence  
757 data. *Bioinformatics* **30**, 2114–2120 (2014).
- 758 84. Dobin, A. *et al.* STAR: ultrafast universal RNA-seq aligner. *Bioinformatics* **29**, 15–21 (2013).
- 759 85. Lawrence, M. *et al.* Software for computing and annotating genomic ranges. *PLoS Comput. Biol.*  
760 **9**, e1003118–e1003118 (2013).
- 761 86. Anders, S. & Huber, W. Differential expression analysis for sequence count data. *Genome Biol.*  
762 **11**, R106 (2010).
- 763 87. Lerat, E., Fablet, M., Modolo, L., Lopez-Maestre, H. & Vieira, C. TEtools facilitates big data  
764 expression analysis of transposable elements and reveals an antagonism between their activity and  
765 that of piRNA genes. *Nucleic Acids Res.* **45**, e17–e17 (2017).
- 766 88. Ramírez, F., Dünder, F., Diehl, S., Grüning, B. A. & Manke, T. deepTools: a flexible platform for  
767 exploring deep-sequencing data. *Nucleic Acids Res.* **42**, W187–W191 (2014).

- 768 89. Quinlan, A. R. & Hall, I. M. BEDTools: a flexible suite of utilities for comparing genomic  
769 features. *Bioinformatics* **26**, 841–842 (2010).
- 770 90. Heinz, S. *et al.* Simple combinations of lineage-determining transcription factors prime cis-  
771 regulatory elements required for macrophage and B cell identities. *Mol Cell* **38**, 576–589 (2010).
- 772 91. Fornes, O. *et al.* JASPAR 2020: update of the open-access database of transcription factor binding  
773 profiles. *Nucleic Acids Res.* (2019). doi:10.1093/nar/gkz1001
- 774 92. Bailey, T. L. *et al.* MEME Suite: tools for motif discovery and searching. *Nucleic Acids Res.* **37**,  
775 W202–W208 (2009).
- 776 93. Huang, D. W., Sherman, B. T. & Lempicki, R. A. Systematic and integrative analysis of large  
777 gene lists using DAVID bioinformatics resources. *Nat. Protoc.* **4**, 44–57 (2009).
- 778 94. Huang, D. W., Sherman, B. T. & Lempicki, R. A. Bioinformatics enrichment tools: paths toward  
779 the comprehensive functional analysis of large gene lists. *Nucleic Acids Res.* **37**, 1–13 (2009).

780

## 781 **Figure legends**

782 Figure 1. Chromatin accessibility in bovine oocytes and *in vitro* preimplantation embryos. A) Schematic  
783 of *in vitro* embryo production and ATAC-seq library preparation. B) Principal components analysis  
784 (PCA) of ATAC-seq read depth normalized by reads per kilobase million (RPKM) in 50 bp windows  
785 covering the whole genome. C) Normalized coverage (RPKM) of replicate ATAC-seq libraries for each  
786 stage of development. D) Proportion of genome covered by genic and intergenic ATAC-seq peaks, called  
787 from 30 million reads at each developmental stage. E) Categorization of accessible regions in 2-, 4-, and  
788 8-cell embryos into stage-specific and maintained peaks (accessibility maintained up until the morula  
789 stage). Maintained peaks are carried over from latter stages to show cumulative maintained peaks.

790

791 Figure 2. Gradual establishment of open chromatin enriched for regulatory motifs. A) Regions that  
792 significantly lost accessibility from the GV oocyte to 2-cell stage, and regions that significantly gained  
793 accessibility from the 2- to 4-cell, 4- to 8-cell, and 8-cell to morula stages, according to 30 million reads

794 per stage. Accessibility at each region, scaled to average width  $\pm$  1 kb, was determined by normalized  
795 ATAC-seq read depth (reads per kilobase million; RPKM), based on 20 million reads per stage. B) Top  
796 five enriched *de novo* motifs enriched in intergenic peaks with matching known motifs (match score >  
797 0.6) of TFs that were expressed at the given stage. C) Top seven known motifs enriched in 4-cell specific  
798 peaks. D) DESeq2 normalized expression of TFs corresponding to enriched motifs in 4-cell specific open  
799 chromatin. E) Top seven known motifs enriched in 8-cell specific peaks. F) DESeq2 normalized  
800 expression of TFs corresponding to enriched motifs in 8-cell specific open chromatin. G) Proportion of  
801 intergenic 8-cell peaks overlapping the *de novo* motif most closely matching the DUXA motif, relative to  
802 background. H) DESeq2 normalized expression of DUXA throughout development. RNA-seq data from  
803 Graf *et al* (2014).

804

805 Figure 3. Binding motif enrichment in regions that opened at the 2-, 4-, or 8-cell stages and remained  
806 open until at least the morula stage. Proportion of peaks with A) CTCF or B) KLF5 binding motifs. C)  
807 DESeq2 normalized expression of KLFs. RNA-seq data from Graf *et al* (2014). D) Proportion of  
808 maintained and stage-specific peaks that were genic or intergenic. E) Gene ontology term enrichment of  
809 the 9,456 genes that were marked by maintained genic open chromatin that was first established in 2- or  
810 4-cell embryos.

811

812 Figure 4. Effect of transcription inhibition on chromatin remodeling. A) Accessibility status of loci that  
813 should have opened or closed between consecutive stages in TBEs. ATAC-seq peaks were called based  
814 on 20 million reads per stage and categorized as either genic or intergenic. B) Normalized read depth  
815 (RPKM) at loci which opened during the 4- to 8-cell transition in 8-cell control and transcriptionally  
816 inhibited embryos. Regions scaled to average width  $\pm$  1 kb. C) Normalized ATAC-seq and RNA-seq  
817 signal (RPKM) in 8-cell and 8-cell TBEs at the KLF4 locus. RNA-seq data from Bogliotti *et al* (2019).  
818 D) Proportion of stage-specific and maintained peaks that should appear at each stage, but which fail to  
819 open in TBEs.



820 Figure 5. Expression and accessibility dynamics of repeat families during bovine preimplantation  
821 development. A) DESeq2 normalized expression profiles of select LTR, LINE, and SINE repeat families.  
822 RNA-seq data from Graf *et al* (2014). B) Enrichment of several transposable element families in ATAC-  
823 seq peaks, called from 30 million reads. Promoter peaks fell within the 2 kb region upstream of  
824 transcription start sites (TSS). Intergenic peaks did not overlap the 2 kb regions upstream of TSS, exons,  
825 or introns.

826

827 Figure 6. Activity of LTR elements in bovine preimplantation embryos. A) Enrichment of LTR elements  
828 in open chromatin in 4-cell, 8-cell, and morula-stage embryos, and expression of the same LTR elements.  
829 Variance-stabilized normalized expression shown for three replicates per stage. B) ATAC-seq and RNA-  
830 seq read coverage at a highly expressed ERV1-2\_BT locus. ATAC-seq tracks show coverage from 30  
831 million reads per library; RNA-seq tracks show combined coverage from three replicates. TF motifs  
832 predicted from JASPAR binding motifs MA0039.3 (KLF4) and MA0712.1 (OTX2), respectively. C)  
833 Average normalized ATAC-seq and D) RNA-seq signal (RPKM) at MLT1A0 repeats overlapped by 8-  
834 cell intergenic open chromatin harboring DUXA motifs, predicted from JASPAR motif MA0468.1. E)  
835 Co-option of an accessible MLT1A0 element with a DUXA binding motif as an alternative promoter  
836 upstream of the C1D locus. RNA-seq data from Graf *et al* (2014).

837

838 Figure 7. Inference of key regulatory factors during EGA in cattle, human, and mouse, based on  
839 enrichment of TF binding motifs in open chromatin and expression of the corresponding TFs. Bovine  
840 RNA-seq data from Graf *et al* (2014); human ATAC-seq and RNA-seq data from Wu *et al* (2018); mouse  
841 ATAC-seq and RNA-seq from Wu *et al* (2016).

842

843 Figure 8. Potential mechanistic model depicting events leading to major EGA. We postulate that  
844 chromatin structure is globally decondensed following fertilization, allowing opportunistic binding of  
845 maternal factors which initiate a minor wave of transcription and begin to establish 3D chromatin

846 architecture. This sets the stage for major EGA, wherein maternal products, minor EGA products, and  
847 promoter-enhancer contacts collectively regulate the first major wave of gene expression and continue to  
848 refine 3D chromatin structure.

Figure 1.

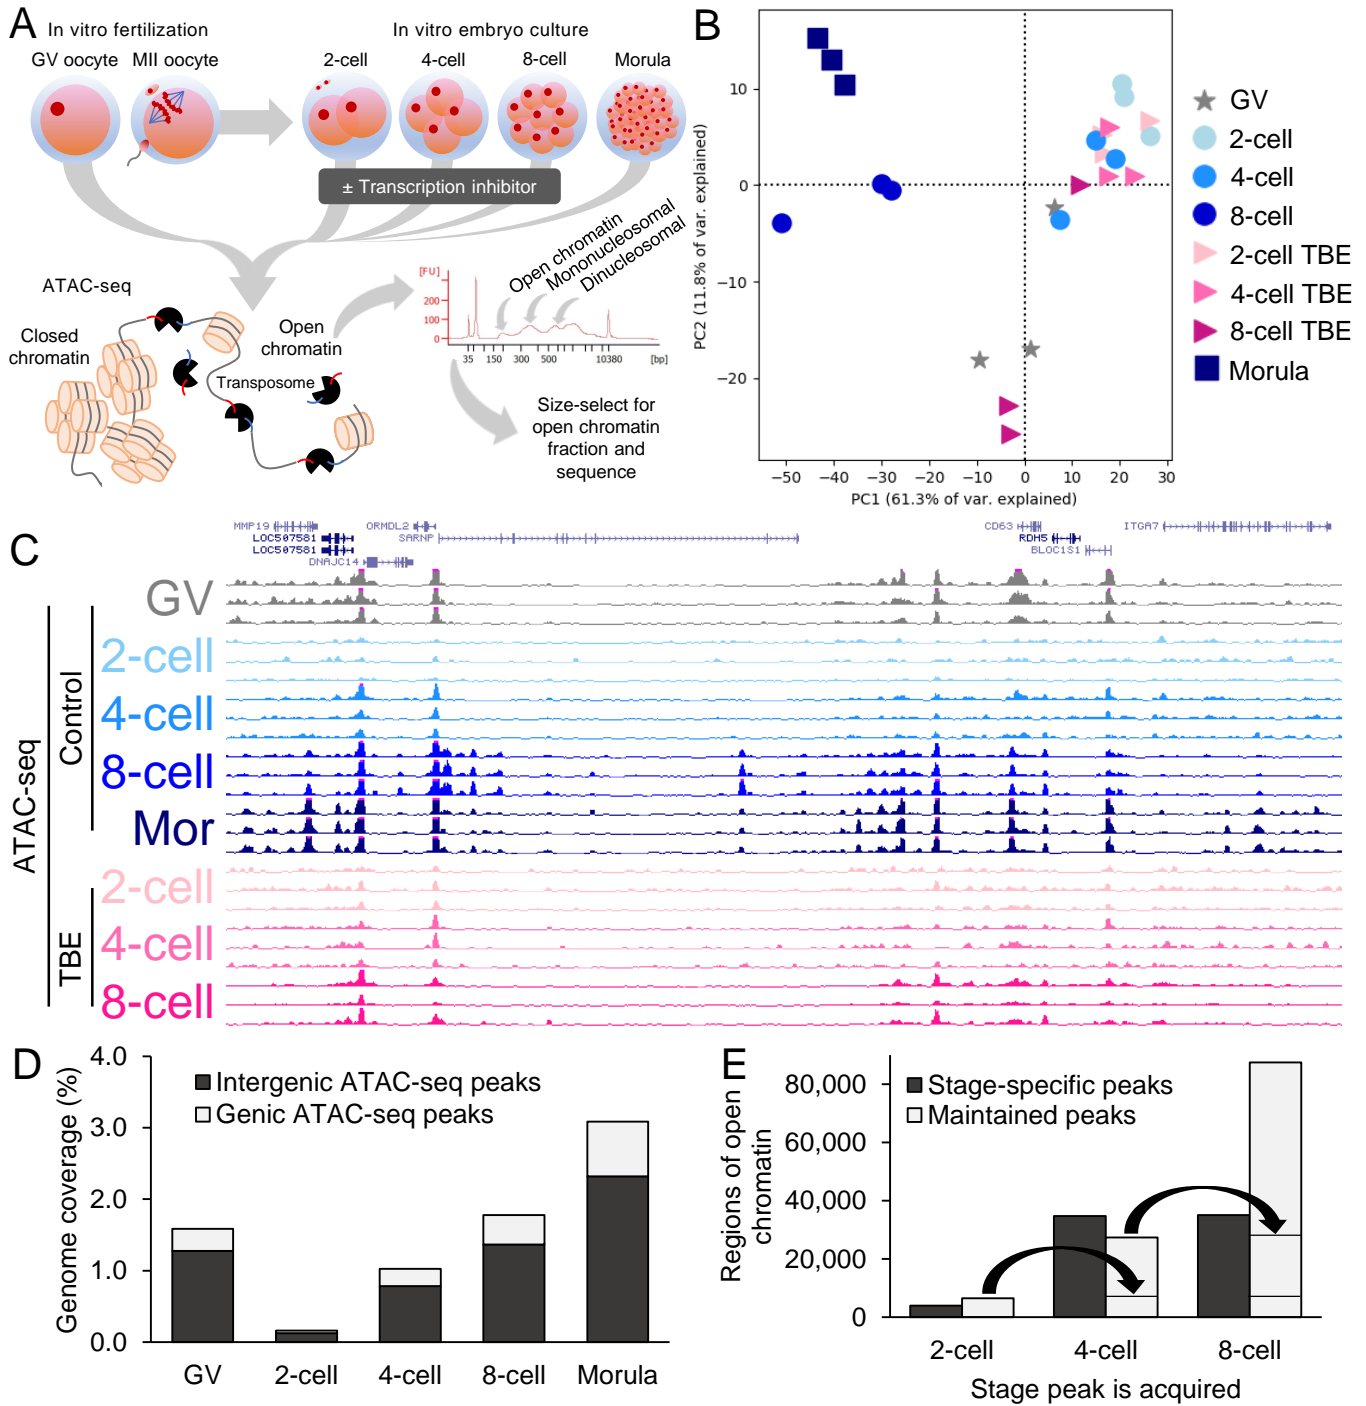

Figure 2.

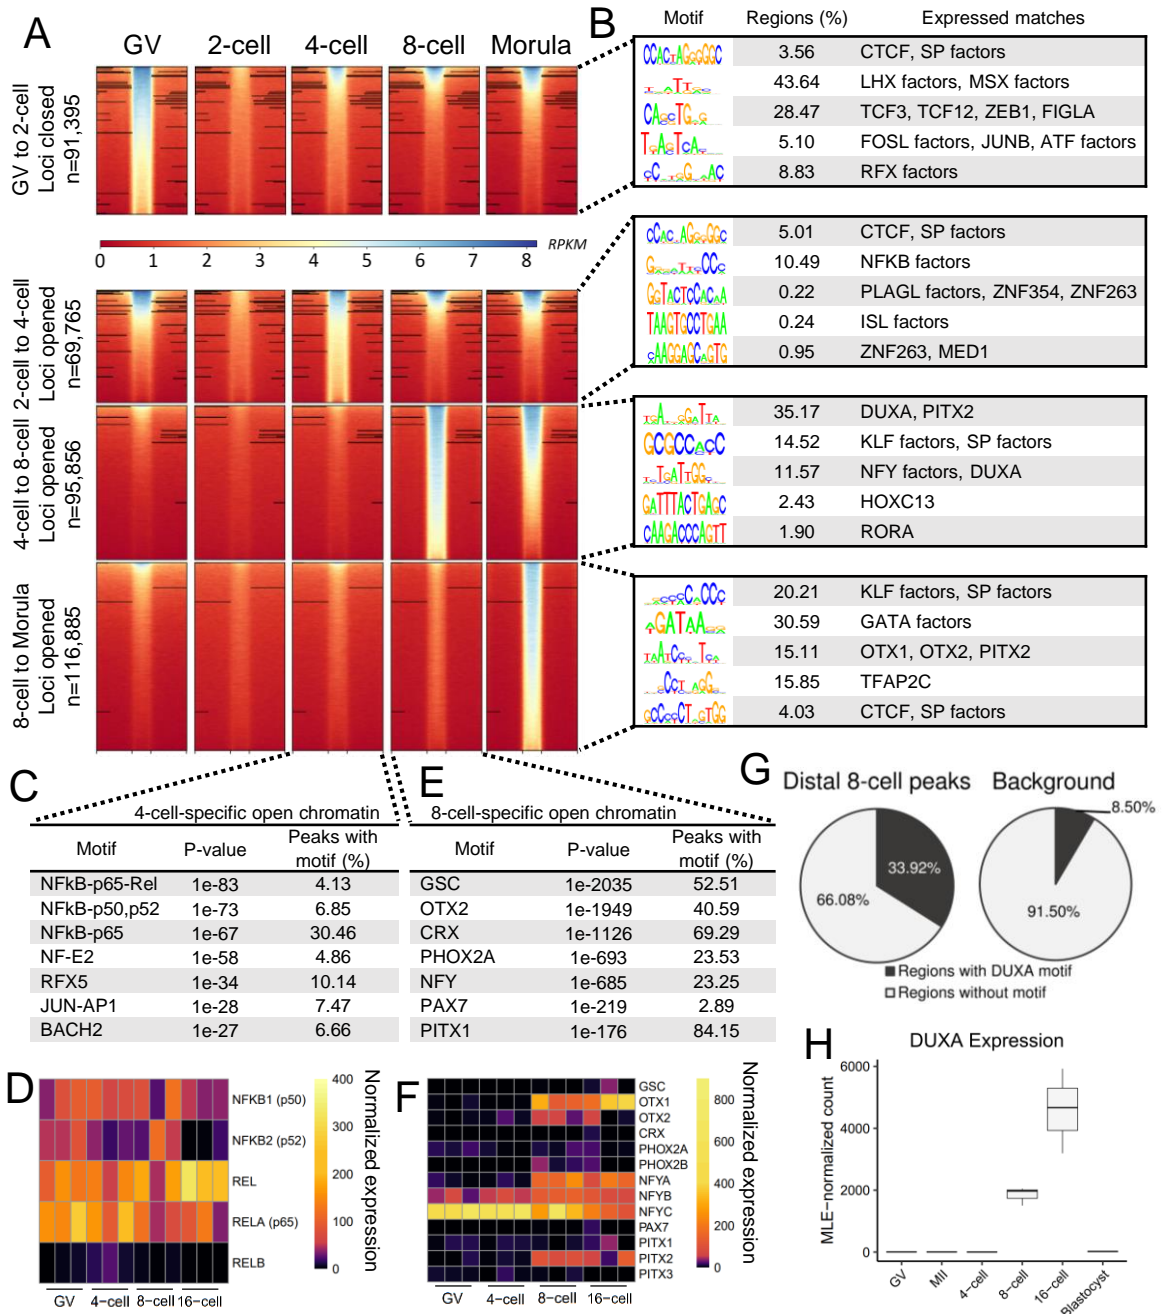

Figure 3.

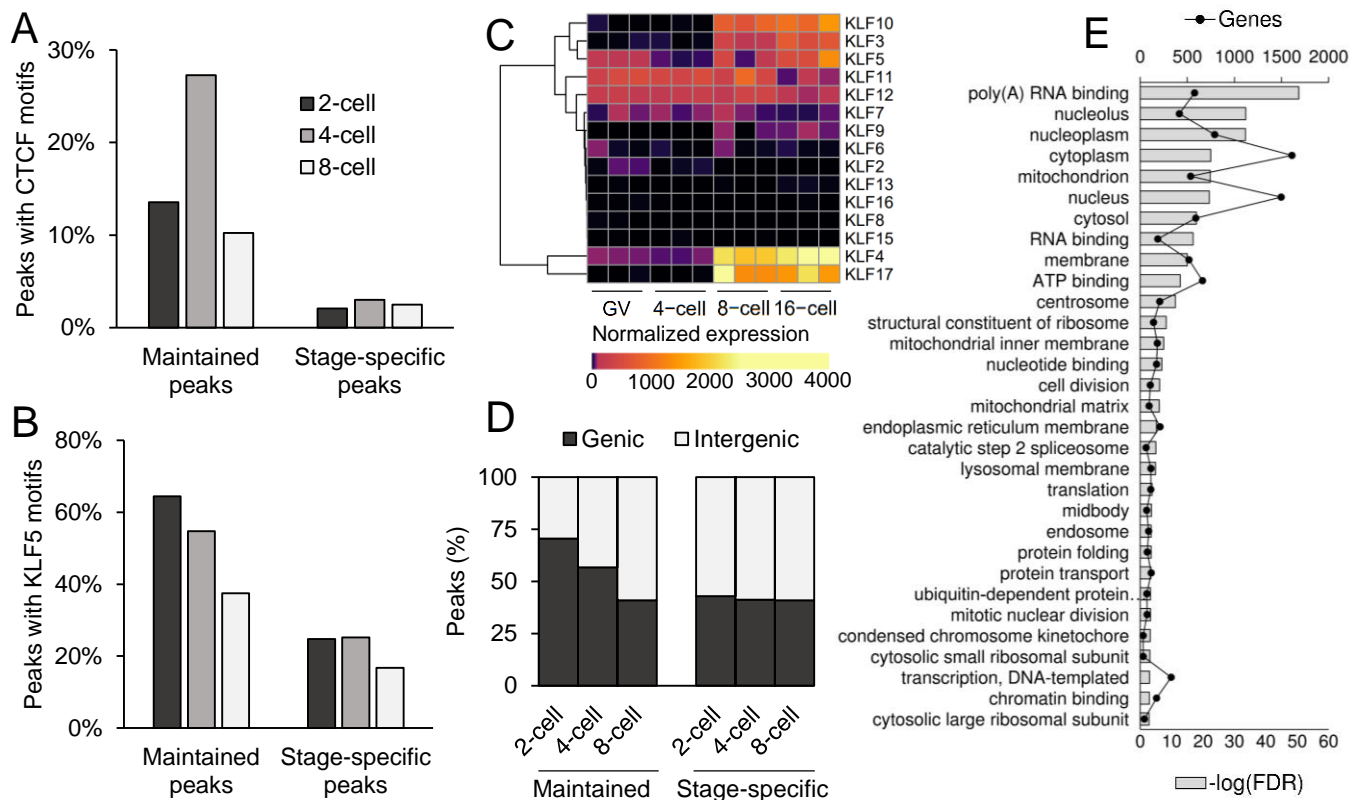

Figure 4.

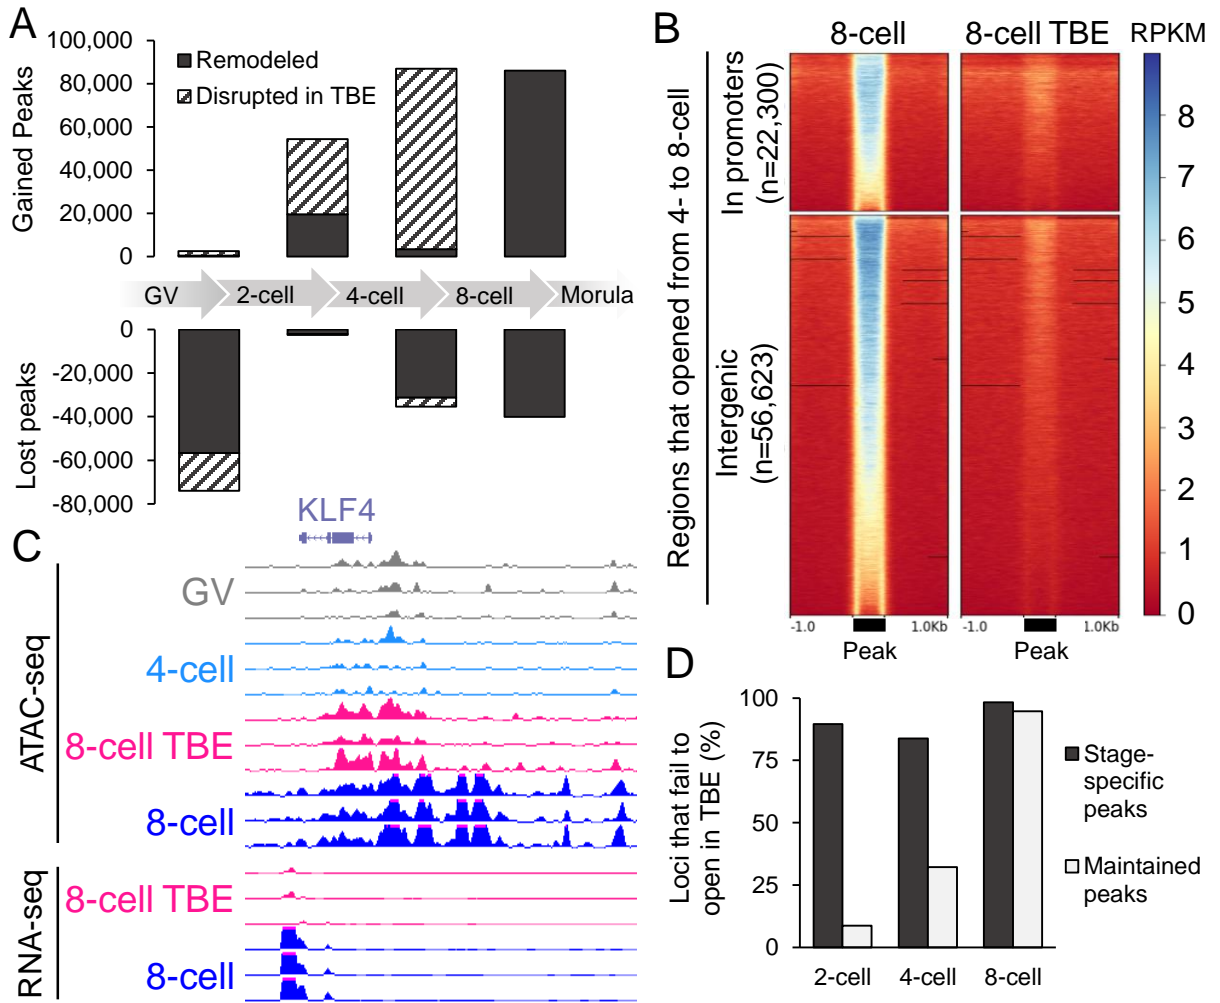

Figure 5.

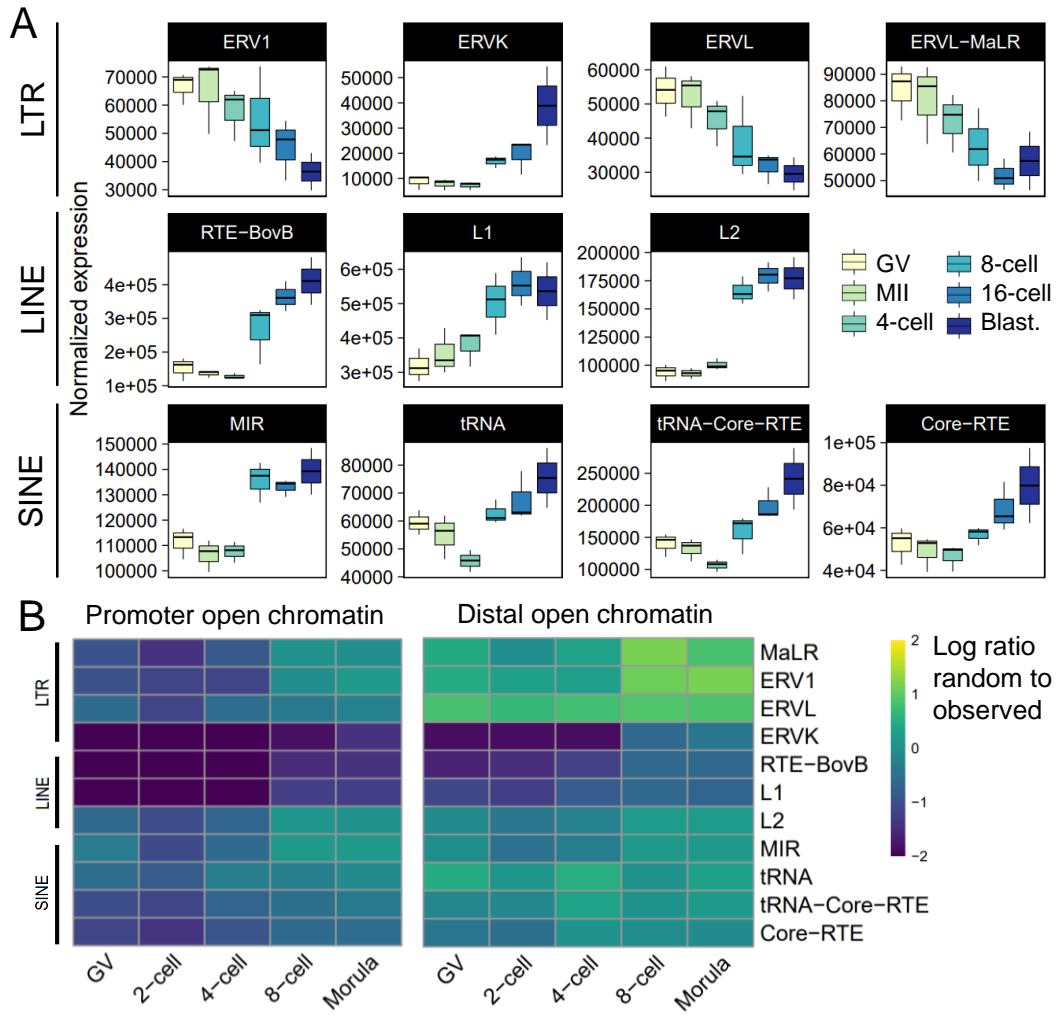

Figure 6.

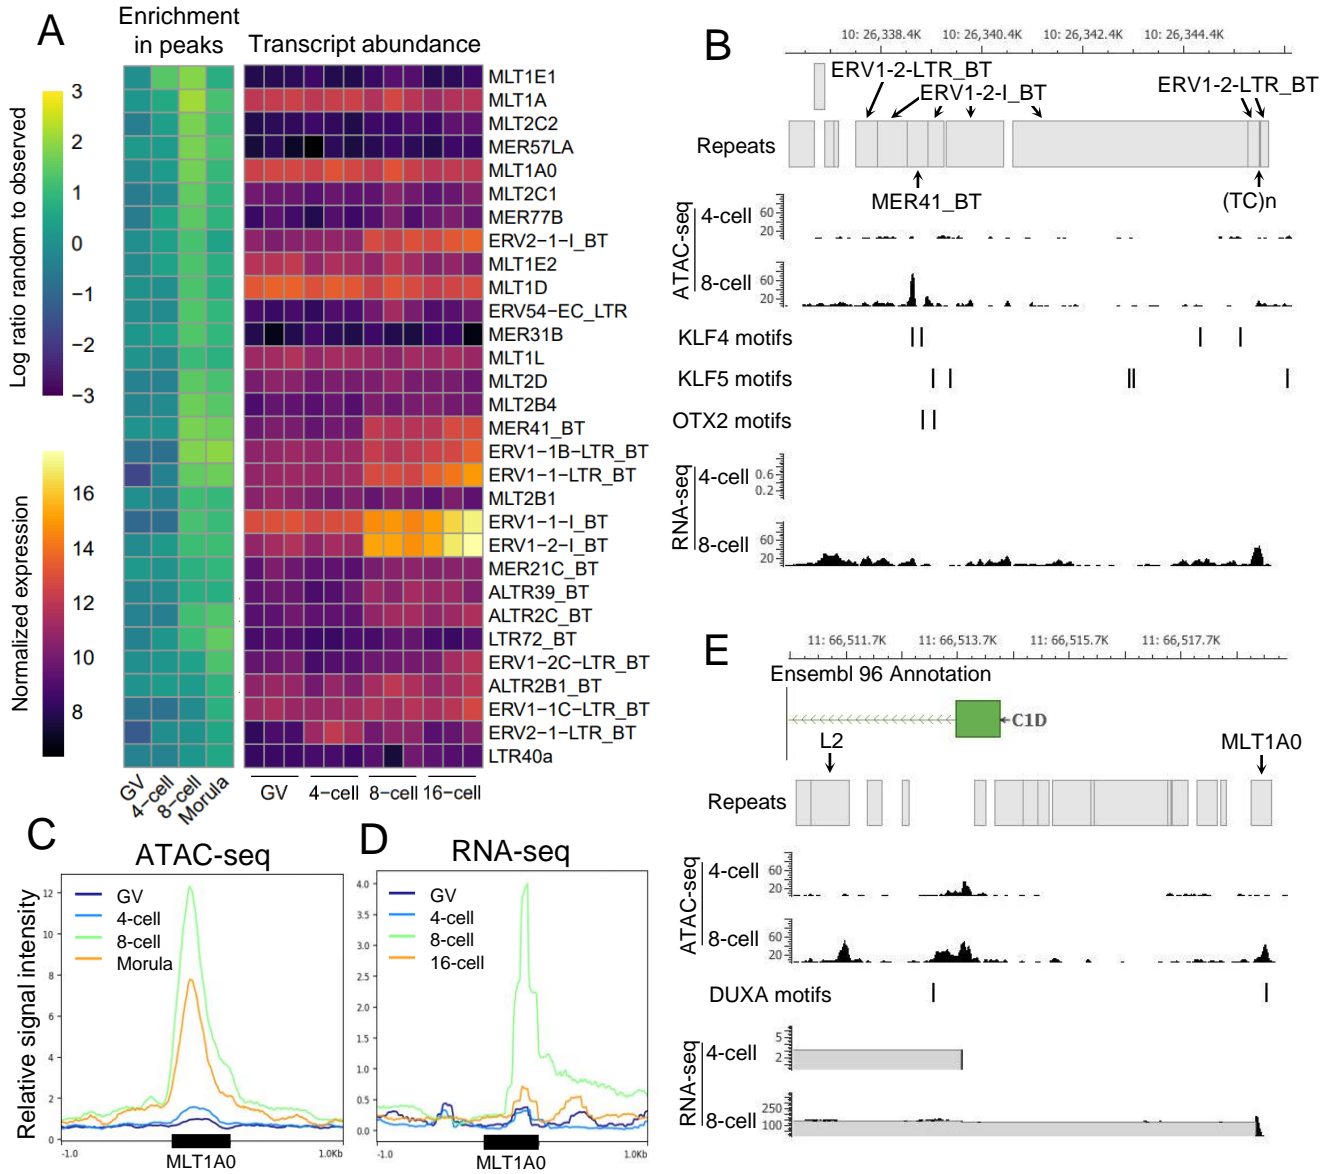



Figure 7.

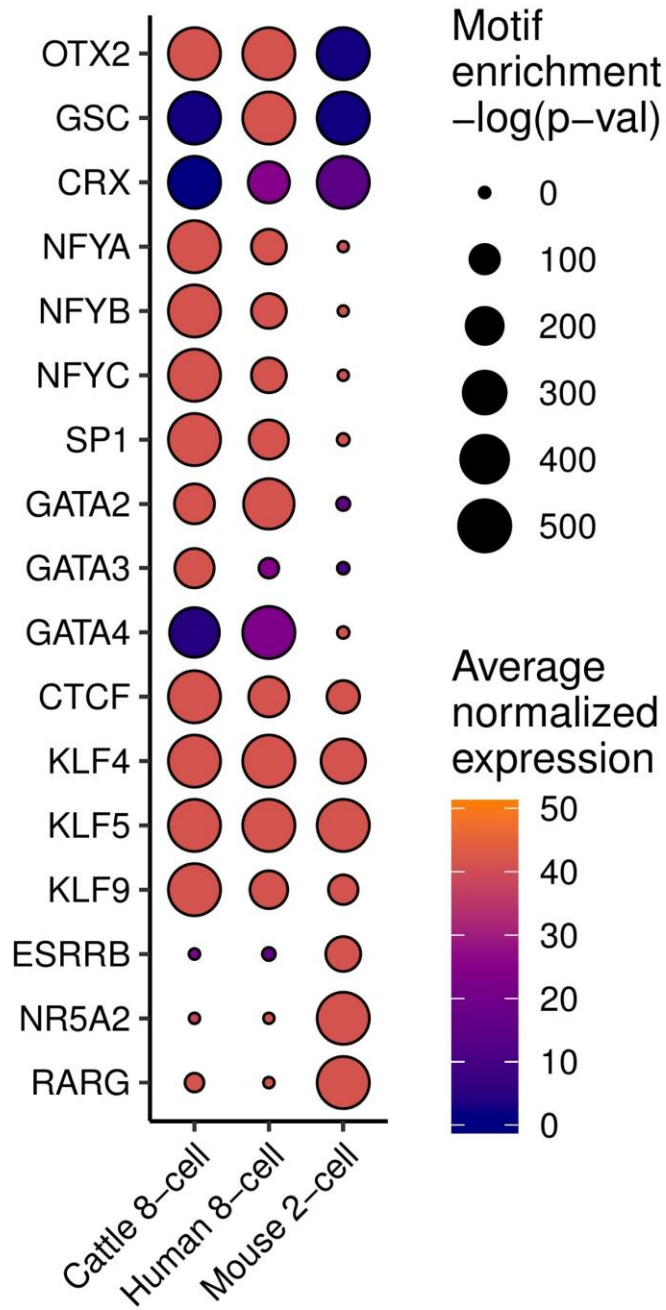

Figure 8.

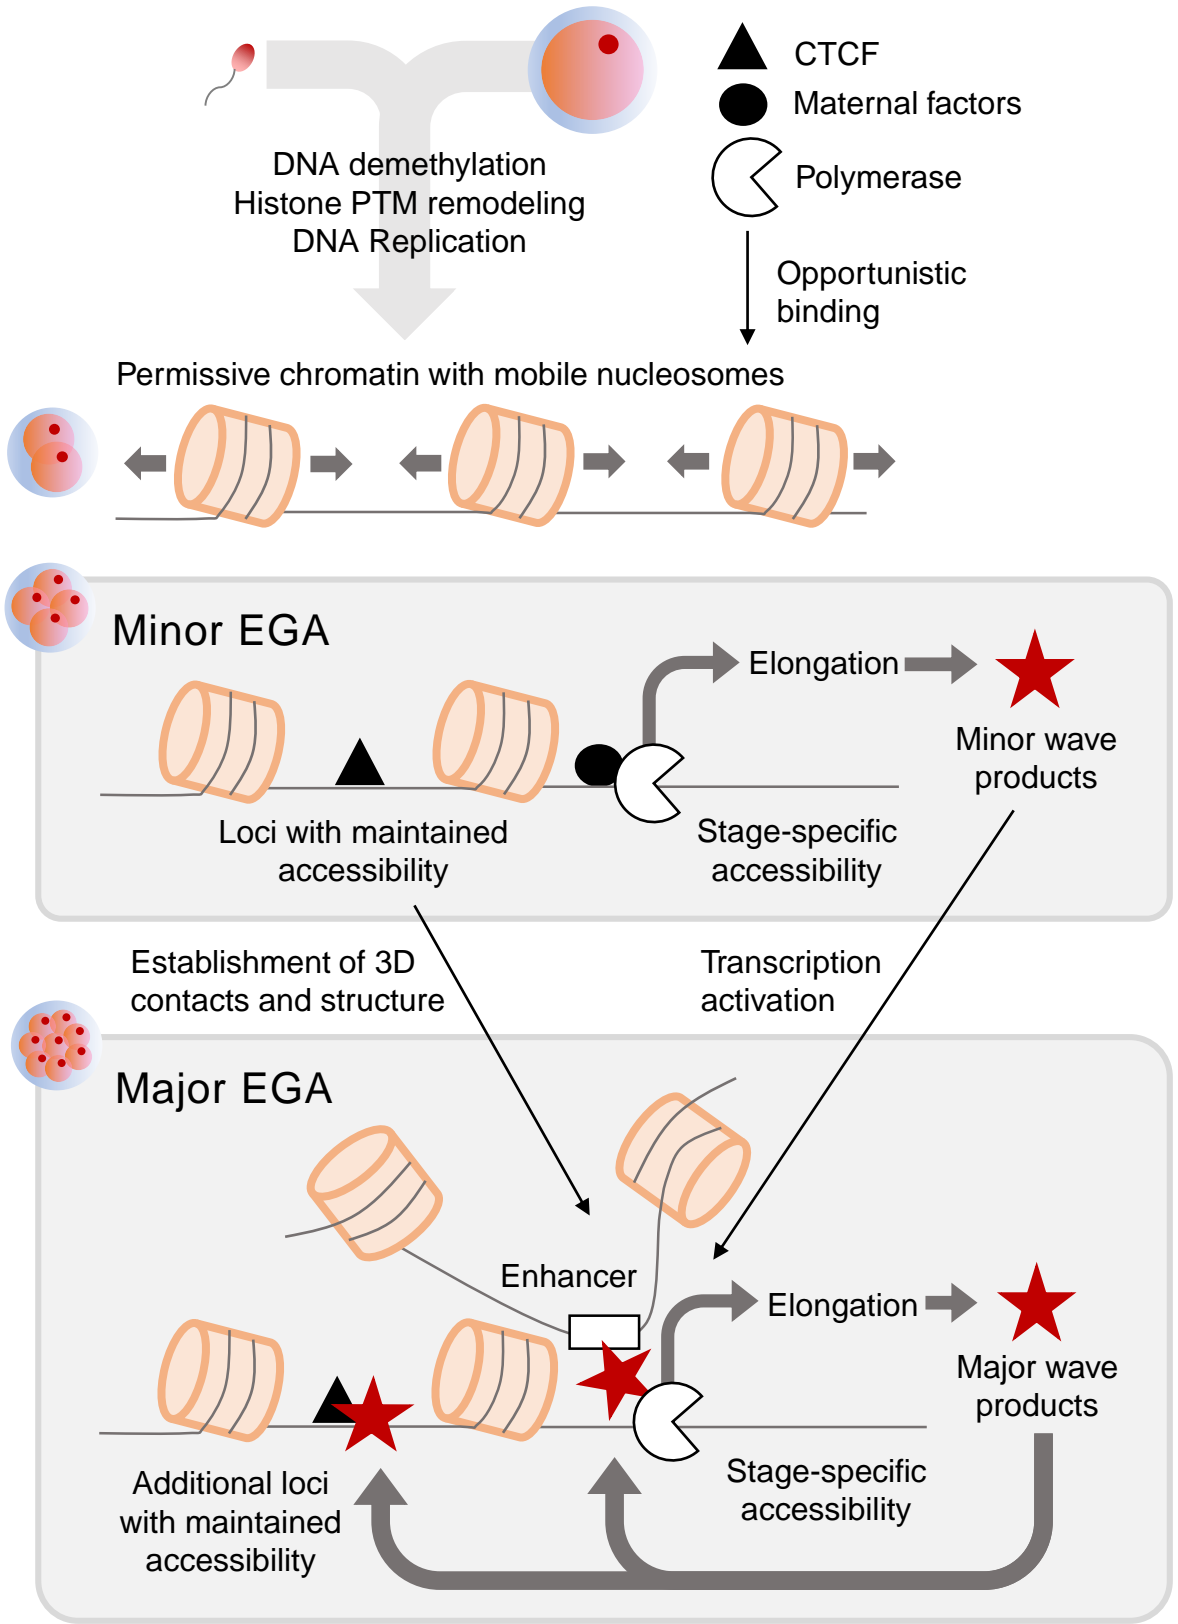

Source: https://www.biorxiv.org/content/10.1101/2019.12.12.874479v2.full.pdf
